# Supplementary material
Source: PubMed Central journal article supplement (PMC5483334)
Supplement: NIHMS868554-supplement-SI.pdf [file NIHMS868554-supplement-SI.pdf]

# Supporting Information

## Polyketide bio-derivatization

### using the promiscuous acyltransferase KirCII

Ewa M. Musiol-Kroll<sup>1,2,4,#</sup>, Florian Zubeil<sup>3,#</sup>, Thomas Schafhauser<sup>4</sup>, Thomas Härtner<sup>4</sup>,  
Andreas Kulik<sup>4</sup>, John McArthur<sup>5,7</sup>, Irina Koryakina<sup>5,8</sup>, Wolfgang Wohlleben<sup>2,4</sup>, Stephanie  
Grond<sup>3</sup>, Gavin J. Williams<sup>5\*</sup>, Sang Yup Lee<sup>1,6\*</sup> and Tilmann Weber<sup>1,2,4\*</sup>

#Equal contribution

<sup>1</sup>Novo Nordisk Foundation Center for Biosustainability, Technical University of Denmark, Kemitorvet B220, 2800 Kgs. Lyngby, Denmark

<sup>2</sup>German Centre for Infection Research (DZIF), Partner site Tübingen, IMIT, Auf der Morgenstelle 28, 72076 Tübingen, Germany

<sup>3</sup>Eberhard Karls Universität Tübingen, Institut für Organische Chemie, Auf der Morgenstelle 18, 72076 Tübingen, Germany

<sup>4</sup>Eberhard Karls Universität Tübingen, Interfakultäres Institut für Mikrobiologie und Infektionsmedizin, Mikrobiologie/Biotechnologie, Auf der Morgenstelle 28, 72076 Tübingen, Germany

<sup>5</sup>North Carolina State University, Department of Chemistry, Raleigh, NC 27695-8204, USA

<sup>6</sup>Department of Chemical and Biomolecular Engineering (BK21 Plus Program), Korea Advanced Institute of Science and Technology (KAIST), 291 Daehak-ro, Yuseong-gu, Daejeon 34141, Republic of Korea

<sup>7</sup>Present address: Department of Chemistry, University of California, One Shields Avenue, Davis, USA

<sup>8</sup>Present address: Intrexon Corporation, South San Francisco, California, USA

\*Corresponding authors: Gavin Williams: [gjwillia@ncsu.edu](mailto:gjwillia@ncsu.edu), Sang Yup Lee: [leesy@kaist.ac.kr](mailto:leesy@kaist.ac.kr) and Tilmann Weber: [tiwe@biosustain.dtu.dk](mailto:tiwe@biosustain.dtu.dk)

## Table of Contents

|                                                                                                |           |
|------------------------------------------------------------------------------------------------|-----------|
| <b>I. Supplementary Material and Methods</b>                                                   | <b>3</b>  |
| 1. Media                                                                                       | 3         |
| 2. Buffers                                                                                     | 4         |
| 3. In vitro assay solutions                                                                    | 5-6       |
| 4. Antibiotics                                                                                 | 6         |
| 5. Strains                                                                                     | 7         |
| 6. Plasmids                                                                                    | 7         |
| 7. Primers and PCRs                                                                            | 8         |
| 8. HPLC/ESI-MS analysis of allyl-kirromycin and propargyl-kirromycin extracts                  | 8         |
| 9. Testing of kirromycin, allyl-kirromycin and coumarin-kirromycin in an <i>in vitro</i> assay | 9         |
| <b>II. Supplementary Results</b>                                                               |           |
| Supplementary Figures 1-5                                                                      | 10-26     |
| Supplementary Tables 1-3                                                                       | 27-31     |
| <b>III. References</b>                                                                         | <b>32</b> |

# I. Supplementary Material and Methods

## 1. Media

| Medium                                                                                 | Composition                                                        | Ingredient amount<br>per 1L H <sub>2</sub> O <sub>deion</sub> | Source*                   |
|----------------------------------------------------------------------------------------|--------------------------------------------------------------------|---------------------------------------------------------------|---------------------------|
| LB-medium<br>ready for use                                                             | LB powder                                                          | 20 g                                                          | Roth                      |
| TSB-medium<br>(Bacto™ Tryptic Soy<br>Broth Soybean-<br>Casein Digest) ready<br>for use | TSB powder                                                         | 30 g                                                          | Becton, Dickinson         |
| SGG-medium                                                                             | Starch (soluble)                                                   | 10 g                                                          | Merck                     |
|                                                                                        | Glucose                                                            | 10 g                                                          | Roth                      |
|                                                                                        | Glycerol                                                           | 10 g                                                          | Roth                      |
|                                                                                        | Cronsteep Powder                                                   | 2.5 g                                                         | Marcor                    |
|                                                                                        | BactoPeptone                                                       | 5 g                                                           | Becton, Dickinson         |
|                                                                                        | Yeast extract                                                      | 2 g                                                           | OhlyKAT                   |
|                                                                                        | Sodium chloride                                                    | 1 g                                                           | Roth                      |
|                                                                                        | Calcium carbonate                                                  | 3 g                                                           | Roth                      |
|                                                                                        | pH 7.3                                                             |                                                               |                           |
| 4xYTP                                                                                  | Tryptone (pancreatic<br>digest of casein)                          | 32 g                                                          | Becton, Dickinson<br>Roth |
|                                                                                        | Yeast extract                                                      | 20 g                                                          | Roth                      |
|                                                                                        | Sodium chloride                                                    | 10 g                                                          | Roth                      |
|                                                                                        | Sodium dihydrogen<br>phosphate (NaH <sub>2</sub> PO <sub>4</sub> ) | 6.87 g                                                        | Merck                     |
|                                                                                        | Sodium phosphate<br>dibasic (Na <sub>2</sub> HPO <sub>4</sub> )    | 11.36 g                                                       | Roth                      |
| 2xYTPG                                                                                 | 4xYTP                                                              | 400 ml of 1l                                                  | -                         |
|                                                                                        | 0.2 M Glucose<br>(autoclave separately)                            | 400 ml of 1l                                                  |                           |

\*All chemicals from Sigma, except when otherwise indicated.

## 2. Buffers (for *in vitro* assay)

| Buffer                                                 | Composition                                           | Concentration  |
|--------------------------------------------------------|-------------------------------------------------------|----------------|
| Buffer B (for S12 extract preparation)                 | Tris/HCl                                              | 10 mM          |
|                                                        | Magnesium acetate                                     | 14 mM          |
|                                                        | Potassium glutamate                                   | 60 mM          |
|                                                        | DTT                                                   | 1 mM           |
|                                                        | pH 8.2                                                |                |
| Buffer A (for S12 extract preparation)                 | Buffer B                                              | 99.95% (v/v)   |
|                                                        | $\beta$ -Mercaptoethanol                              | 0.05% (v/v)    |
| 2.5x ivTT-Buffer (for <i>in vitro</i> assay)           | Hepes                                                 | 142.5 mM       |
|                                                        | Potassium glutamate                                   | 225 mM         |
|                                                        | Ammonium acetate                                      | 200 mM         |
|                                                        | Magnesium acetate                                     | 30 mM          |
|                                                        | PEG(8000)                                             | 1.67% (w/v)    |
|                                                        | Dithiothreitol (DTT)                                  | 5 mM           |
|                                                        | pH 8.2                                                |                |
| 10x Energy mix (for <i>in vitro</i> assay)             | AMP (100x)                                            | 10% (v/v)      |
|                                                        | CMP (100x)                                            | 10% (v/v)      |
|                                                        | GMP (100x)                                            | 10% (v/v)      |
|                                                        | UMP (100x)                                            | 10% (v/v)      |
|                                                        | Formyl-FH4 (1000x)                                    | 1% (v/v)       |
|                                                        | F16BP (20x)                                           | 50 % (v/v)     |
|                                                        | H <sub>2</sub> O <sub>deion</sub>                     | 9% (v/v)       |
| 10x Amino acid mix (AA-Mix, for <i>in vitro</i> assay) | 300x AA resolved in H <sub>2</sub> O <sub>deion</sub> | 9x 3.33% (v/v) |
|                                                        | H <sub>2</sub> O <sub>deion</sub>                     | 3.33% (v/v)    |
|                                                        | 300x AA resolved in 1M HCl                            | 9x 3.33% (v/v) |
|                                                        | 1M HCl                                                | 3.33% (v/v)    |
|                                                        | 300x AA resolved in 1M KOH                            | 2x 3.33% (v/v) |
|                                                        | 1M KOH                                                | 26.64 %        |

### 3. *In vitro* assay stock solutions (for *in vitro* assay buffers)

| Name                                                                         | Stock solution in H <sub>2</sub> O <sub>deion</sub> | Concentration in H <sub>2</sub> O <sub>deion</sub> |
|------------------------------------------------------------------------------|-----------------------------------------------------|----------------------------------------------------|
| Adenosine 5'-monophosphate sodium salt (AMP)                                 | 100x                                                | 120 mM                                             |
| Cytidine 5'-monophosphate disodium salt (CMP)                                | 100x                                                | 85 mM                                              |
| Guanosine 5'-monophosphate disodium salt hydrate (GMP)                       | 100x                                                | 85 mM                                              |
| Uridine 5'-monophosphate disodium salt (UMP)                                 | 100x                                                | 85 mM                                              |
| 5-Formyl-5,6,7,8-tetrahydropteroyl-L-glutamic acid (Formyl-FH <sub>4</sub> ) | 1000x                                               | 34 mg ml <sup>-1</sup>                             |
| D-Fructose 1,6-bisphosphate trisodium salt octahydrate (F16BP)               | 20x                                                 | 660 mM                                             |
| L-Alanine (Ala)                                                              | 300x                                                | 600 mM                                             |
| L-Arginine monohydrochloride (Arg)                                           | 300x                                                | 600 mM                                             |
| Glycine (Gly)                                                                | 300x                                                | 600 mM                                             |
| L-Histidine monohydrochloride monohydrate (His)                              | 300x                                                | 600 mM                                             |
| L-Lysine (Lys)                                                               | 300x                                                | 600 mM                                             |
| L-Proline (Pro)                                                              | 300x                                                | 600 mM                                             |
| L-Serine (Ser)                                                               | 300x                                                | 600 mM                                             |
| L-Threonine (Thr)                                                            | 300x                                                | 600 mM                                             |
| L-Valine (Val)                                                               | 300x                                                | 600 mM                                             |

| Name                                             | Stock solution in 1M HCl | Concentration in 1M HCl |
|--------------------------------------------------|--------------------------|-------------------------|
| L-Asparagine monohydrate (Asn)                   | 300x                     | 600 mM                  |
| L-Aspartic acid (Asp)                            | 300x                     | 600 mM                  |
| L-Cysteine (Cys)                                 | 300x                     | 600 mM                  |
| L-Glutamine (Gln)                                | 300x                     | 600 mM                  |
| L-Glutamic acid potassium salt monohydrate (Glu) | 300x                     | 600 mM                  |
| L-Leucine (Leu)                                  | 300x                     | 600 mM                  |
| L-Methionine (Met)                               | 300x                     | 600 mM                  |
| L-Tryptophan (Trp)                               | 300x                     | 600 mM                  |
| L-Tyrosine (Tyr)                                 | 300x                     | 600 mM                  |
| L-Isoleucine (Ile)                               | 300x                     | 600 mM                  |
| L-Phenylalanine (Phe)                            | 300x                     | 600 mM                  |

#### 4. Antibiotics

| Antibiotic      | Working concentration for <i>E.coli</i>                              | Working concentration for <i>Streptomyces</i> | Source     |
|-----------------|----------------------------------------------------------------------|-----------------------------------------------|------------|
| Apramycin       | 100 $\mu\text{g ml}^{-1}$                                            | 50 $\mu\text{g ml}^{-1}$                      | Appli-Chem |
| Chloramphenicol | 34 $\mu\text{g ml}^{-1}$                                             | -                                             | Serva      |
| Kanamycin       | 50 $\mu\text{g ml}^{-1}$<br>(for ET12567, 25 $\mu\text{g ml}^{-1}$ ) | -                                             | Appli-Chem |
| Nalidixic acid  | 20 $\mu\text{g ml}^{-1}$                                             | 20 $\mu\text{g ml}^{-1}$                      | Fluka      |
| Tetracycline    | 12.5-25 $\mu\text{g ml}^{-1}$                                        | -                                             | Serva      |

## 5. Strains

| Strain                                 | Specifications                                                                                                                                                                                                                               | Reference or source |
|----------------------------------------|----------------------------------------------------------------------------------------------------------------------------------------------------------------------------------------------------------------------------------------------|---------------------|
| <i>E. coli</i> strains                 |                                                                                                                                                                                                                                              |                     |
| NovaBlue                               | <i>endA1</i> , <i>hsdR17</i> ( $r_{K12}^- m_{K12}^+$ ), <i>supE44</i> , <i>thi-1</i> , <i>recA1</i> , <i>gyrA96</i> , <i>relA1</i> , <i>lac</i> ,<br>F' [ <i>proAB</i> , <i>lacI<sup>f</sup></i> , <i>lacZΔM15</i> , Tn10]; Tet <sup>R</sup> | Novagen             |
| ET12567/pUB307                         | methylation-deficient <i>E. coli</i> strain containing pUB307, F-, <i>dam-13::Tn9</i> , <i>dcm-6</i> , <i>hsdM</i> , <i>hsdR</i> , <i>lacY1</i> , Cam <sup>R</sup> ,<br>pUB307 is a RP1 derivative; Kan <sup>R</sup> , Tet <sup>R</sup>      | 1-3                 |
| <i>Streptomyces</i> strains            |                                                                                                                                                                                                                                              |                     |
| <i>S. collinus</i> Tü 365              | <i>S. collinus</i> wild type strain Tü 365;<br>kirromycin producer                                                                                                                                                                           | 4                   |
| <i>S. collinus</i> pRM4.2- <i>matB</i> | <i>S. collinus</i> containing the integrative plasmid pRM4.2- <i>matB</i> for the expression of MatB (malonyl-CoA synthetase from <i>Rhizobium leguminosarum</i> , WP_011650729.1); Apra <sup>R</sup>                                        | This study          |

## 6. Plasmids

| Plasmid             | Specifications                                                                                             | Reference or source |
|---------------------|------------------------------------------------------------------------------------------------------------|---------------------|
| pET28- <i>matB</i>  | plasmid pET28a (Novagen) with engineered <i>matB</i> gene; Kan <sup>R</sup>                                |                     |
| pET28-egfp          | reporter plasmid (pET28a derivative) for in vitro translation assay; Kan <sup>R</sup>                      | This study          |
| pRM4.2              | pSET152ermEp* derivative (ΦC31 integration vector, ermEp* promoter with artificial RBS); Apra <sup>R</sup> | 5                   |
| pRM4.2- <i>matB</i> | pRM4.2 with engineered <i>matB</i> gene; Apra <sup>R</sup>                                                 | This study          |

## 7. Primers and PCRs

| Primer name   | Sequence (5'→3')   | PCR program*<br>(1. and 2. Denaturation<br>3. Annealing<br>4. Elongation<br>5. Final elongation<br>6. Final hold) |
|---------------|--------------------|-------------------------------------------------------------------------------------------------------------------|
| matB-test-up  | cacacggacggtaacatc | 1. 94°C, 5:00 min<br>2. 94°C, 1:00 min<br>3. 55°C, 1:40 min                                                       |
| matB-test-low | cacgggtcgttctaaagg | 4. 72°C, 2:30 min<br>5. 72°C, 8:00 min<br>6. 4°C, 5 h<br>(Steps 2-4 x 30)                                         |

\*PCR reactions were performed in the thermo cycler **PTC-100 Programmable Thermal Controller (MJ Research)**

## 8. HPLC/ESI-MS analysis of allyl-kirromycin and propargyl-kirromycin extracts

Allyl-kirromycin and propargyl-kirromycin crude extracts obtained from *S. collinus* pRM4.2-*matB* feeding experiments were resolved in 1 ml methanol and analyzed on HPLC-LC/MSD Ultra Trap System XCT 6330, Agilent Technologies. As stationary phase ReproSil-Pur C18 AQ column (5µm, 200 x 2 mm ID, Dr. Maisch) with a precolumn 10 x 2 mm was used (column temperature, 40°C). Solvent A (0.1% formic acid) and solvent B (0.06% formic acid in acetonitrile) were used as mobile phase applying the gradient  $t_0=47\%$  B,  $t_{15}=60\%$  B,  $t_{16}=t_{20}=100\%$ , posttime 12 min of 47% solvent B (flow rate 400 µl/min; injection volume 2.5 µl). UV signals were detected at: 230 nm, 260 nm, 280 nm, 360 nm and 435 nm. Data analysis was done with the Agilent LC/MSD software ChemStation Rev. B.01.03, Agilent. The following parameters were used for the MS detection, ionization: ESI positive and negative, alternating; mode: Ultra Scan; capillary voltage: 3.5 kV; temperature 350°C; target mass  $m/z=800$ ). Data analyses were performed with the software 6300 Series Trap Control Version 6.1, Bruker Daltonik (Agilent).



## 9. Testing of kirromycin, allyl-kirromycin and coumarin-kirromycin in an *in vitro* assay

Kirromycin, allyl-kirromycin and coumarin-kirromycin activity was tested in an eGFP-based *in vitro* transcription/translation assay (Supplementary Fig. 6). Therefore, the derivative samples were analyzed by HPLC/ESI-MS and the compound concentration was calculated using kirromycin standards. Because of the residual of kirromycin in the allyl-kirromycin (90% allyl-kirromycin and 10% kirromycin) and coumarin-kirromycin (96% coumarin-kirromycin and 4% kirromycin) sample, the molarity of these samples was calculated for the total amount of kirromycins, when used in the assay (e.g. 5 $\mu$ M [allyl-kirromycin] = 5 $\mu$ M [90% allyl-kirromycin + 10% kirromycin]). To investigate the potential inhibitory effects of the remaining kirromycin molecules, control reactions covering the respective concentration range were included (Supplementary Table 3).

## II. Supplementary Results

### 1. Supplementary Figures

**Supplementary Figure 1.** HPLC-MS analysis of crude extracts from *S. collinus* pRM4.2-*matB* cultures. (I) Detection of allyl-kirromycin (**2**) in culture fed with allylmalonic acid. (II) Detection of propargyl-kirromycin in culture fed with propargylmalonic acid. (a) Total ion chromatogram and extracted ion chromatogram. (b) Detection of kirromycin derivatives in negative mode. (c) UV/VIS spectrum at 330nm and the ratio of kirromycin and the derivative.

I a)

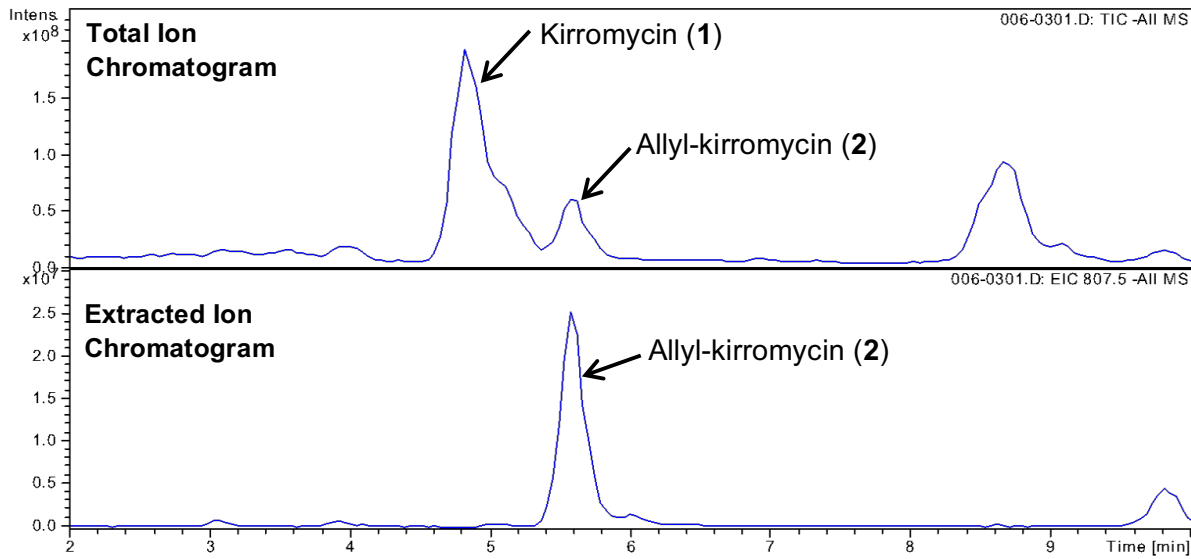

I b)

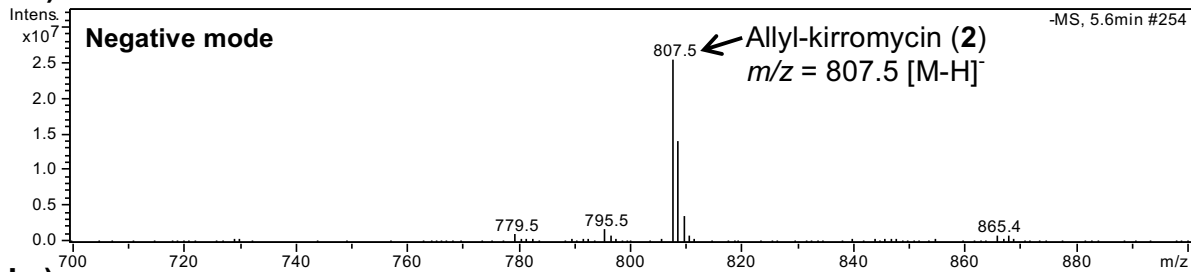

I c)

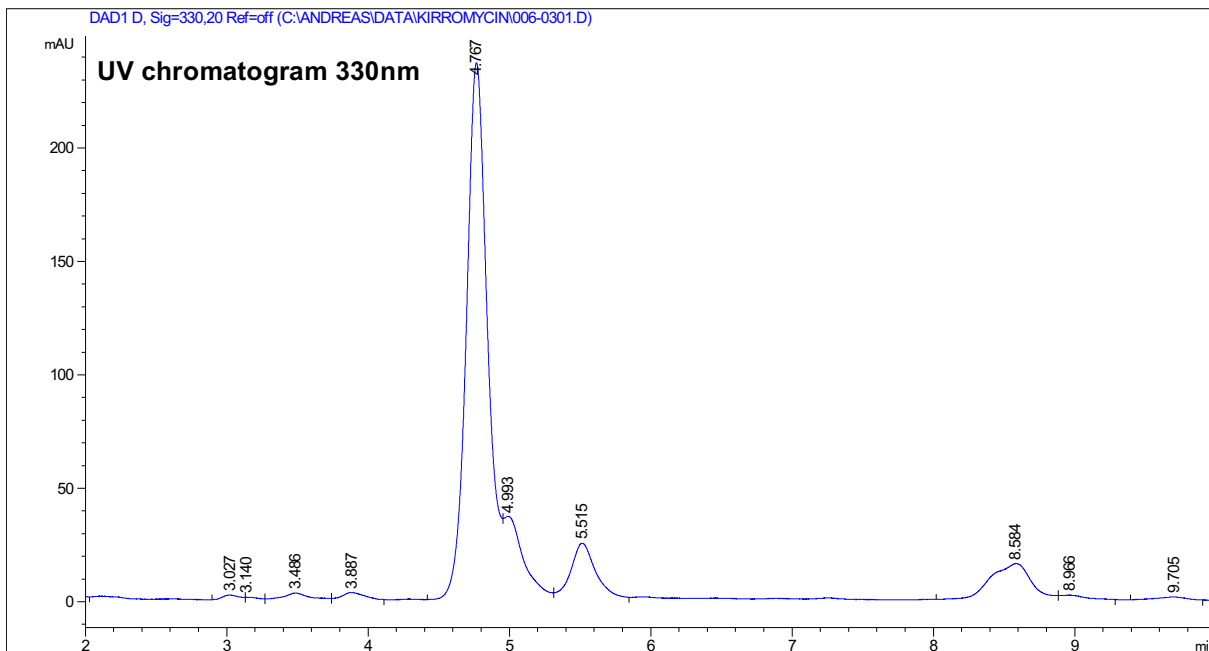

| Compound         | Retention time [min] | Peak area [mAU] | Percentage* (peak area) | Peak intensity (peak height) [mAU] | Percentage* (peak height) |
|------------------|----------------------|-----------------|-------------------------|------------------------------------|---------------------------|
| Kirromycin       | 4.767                | 2421.8          | 89.42%                  | 236.5                              | 90.76%                    |
| Allyl-kirromycin | 5.515                | 286.8           | 10.58%                  | 24.1                               | 9.24%                     |

\*To calculate the ratio of kirromycin and allyl-kirromycin the signals for peak area or peak intensity were set to 100%.

**II a)**

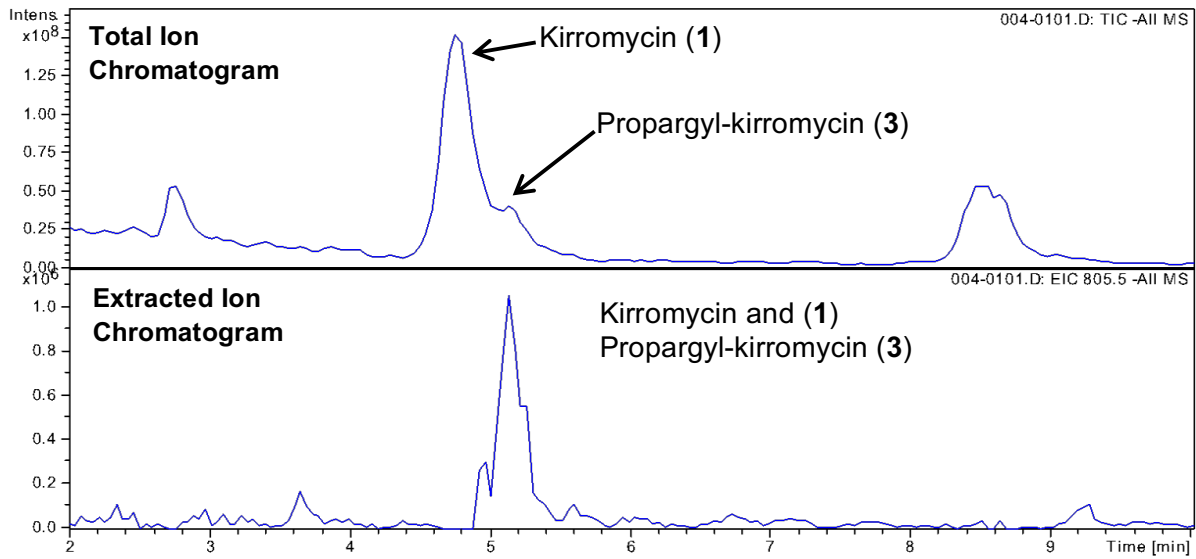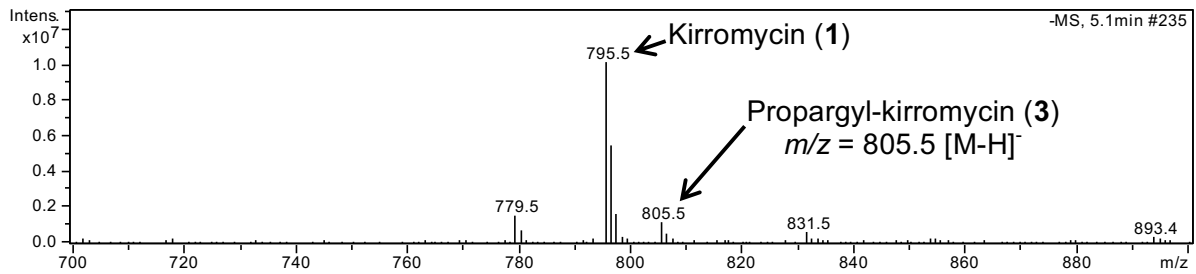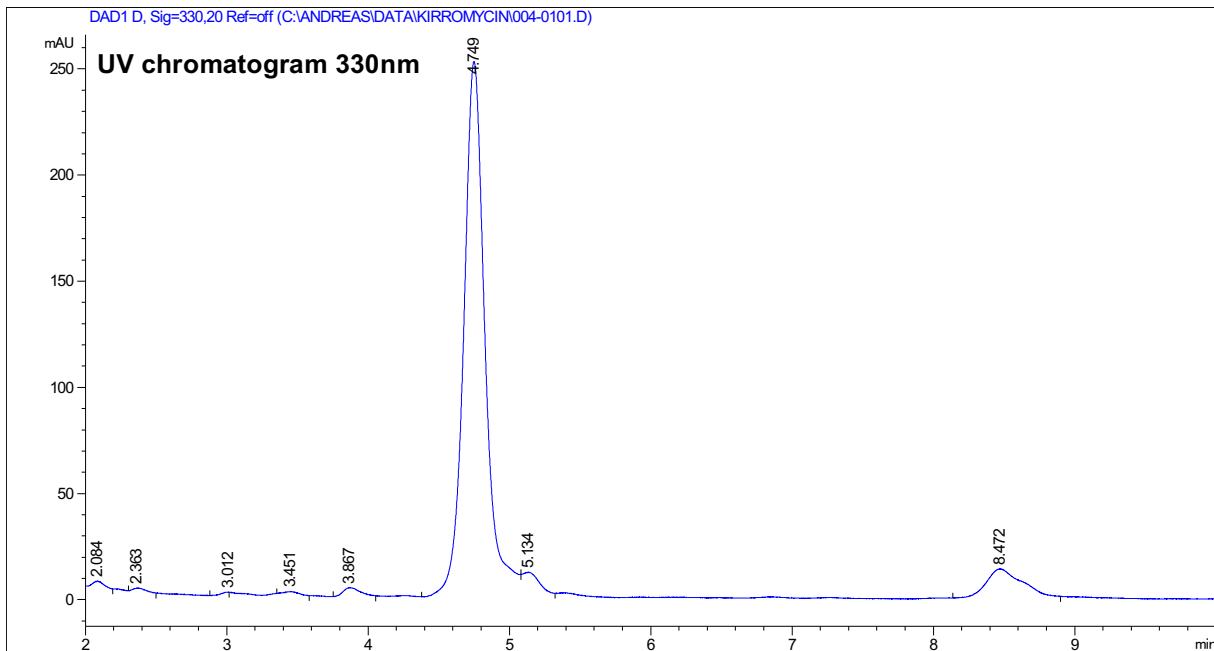

| Compound             | Retention time [min] | Peak area [mAU] | Percentage* (peak area) | Peak intensity (peak height) [mAU] | Percentage* (peak height) |
|----------------------|----------------------|-----------------|-------------------------|------------------------------------|---------------------------|
| Kirromycin           | 4.749                | 2613.8          | 96.79%                  | 251.8                              | 95.86%                    |
| Propargyl-kirromycin | 5.134                | 86.8            | 3.21%                   | 10.5                               | 4.14%                     |

\*To calculate the ratio of kirromycin and allyl-kirromycin the signals for peak area or peak intensity were set to 100%.

**Supplementary Figure 2.** HPLC-MS analysis of crude extracts from *S. collinus* Tü 365 cultures. (I) *S. collinus* Tü 365 without feeding. (II) *S. collinus* Tü 365 fed with allylmalonic acid. (III) *S. collinus* Tü 365 fed with propargylmalonic acid. (a) Total ion chromatogram. (b) Extracted ion chromatogram.

**I a)**

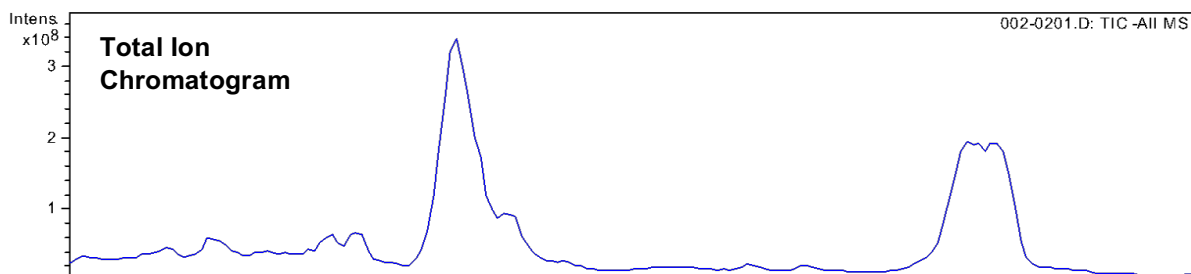

**I b)**

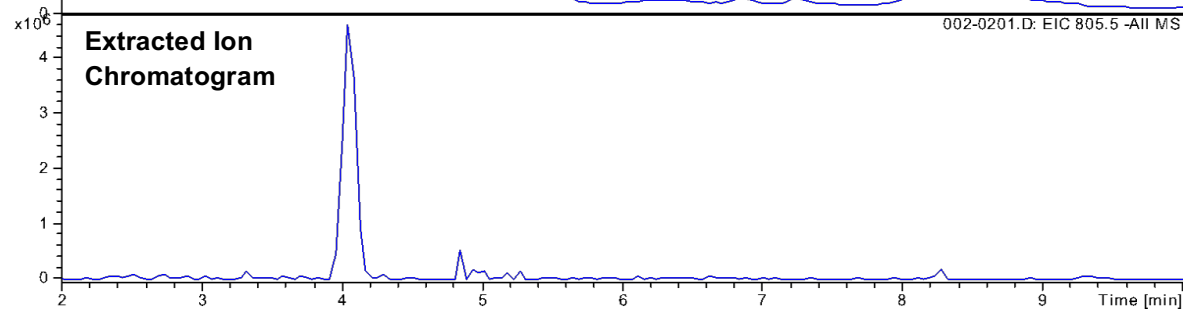

**II a)\***

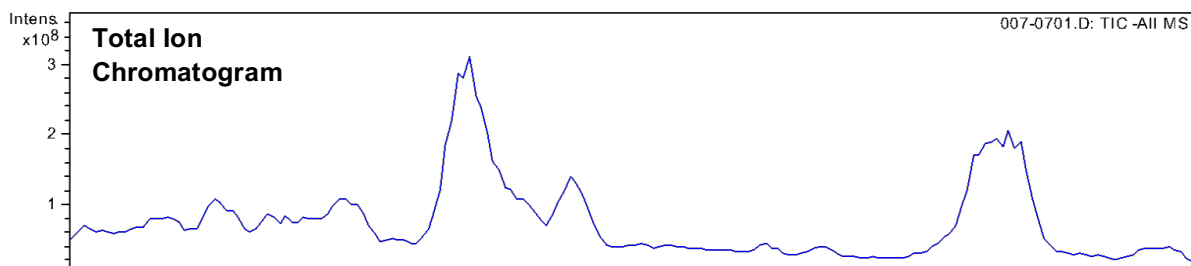

**II b)\***

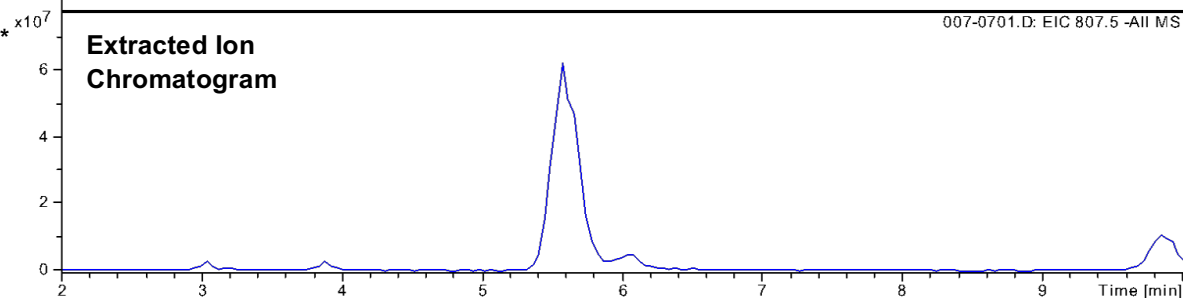

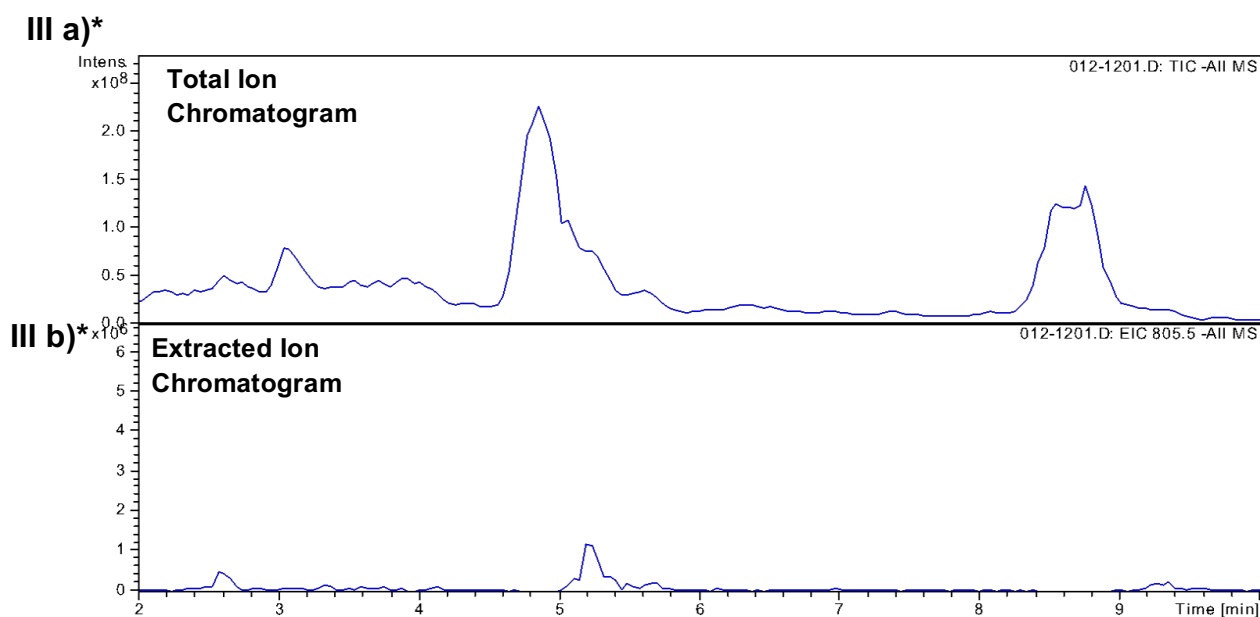

\* The MatB-free *S. collinus* Tü365 strain was fed with allyl- or propargyl- malonic acid. The feeding of allyl-malonic acid resulted in the production of allyl-kirromycin, which indicates that the substrate is activated by malonyl-CoA synthetase homologue enzymes, present in *S. collinus* Tü365. Indeed, the sequence analysis using BLAST revealed that the genome of *S. collinus* Tü365 contains several genes, which encode putative acyl-CoA synthetases. This strongly suggests that at least one of the putative acyl-CoA synthetase enzymes can catalyze the activation of allyl-malonic acid, which is subsequently used in the biosynthesis of kirromycin and the derivative allyl-kirromycin. This finding is not surprising, as activity towards allylmalonate has also been described for the *R. trifolii* wild type MatB<sup>6, 7</sup>.

Traces of a peak with the mass of  $m/z = 805.5 [M-H]^-$  were detected also in the culture filtrate of *S. collinus* Tü365 where no substrate was added and in the MatB-free *S. collinus* Tü365, which was fed with propargylmalonic acid. This indicates that the detected mass is likely of different origin and that the putative acyl-CoA synthetase(s) present in the wild type strain *S. collinus* Tü365 are not able to efficiently activate propargyl-malonic acid. Only in case where the MatB-engineered *S. collinus* Tü365 was fed with propargyl-malonic acid, significant amounts of propargyl-kirromycin were detected and the product could be enriched.

**Supplementary Figure 3.** Suggested fragmentation mechanisms for intermediates A-C. (a) Fragmentation mechanism of intermediates A and B. (b) Fragmentation mechanism of intermediate C. Detected ions are indicated by frames and the calculated  $m/z$  for fragments of kirromycin (1), allyl-kirromycin (2), propargyl-kirromycin (3) and coumarin-kirromycin (4) is provided.

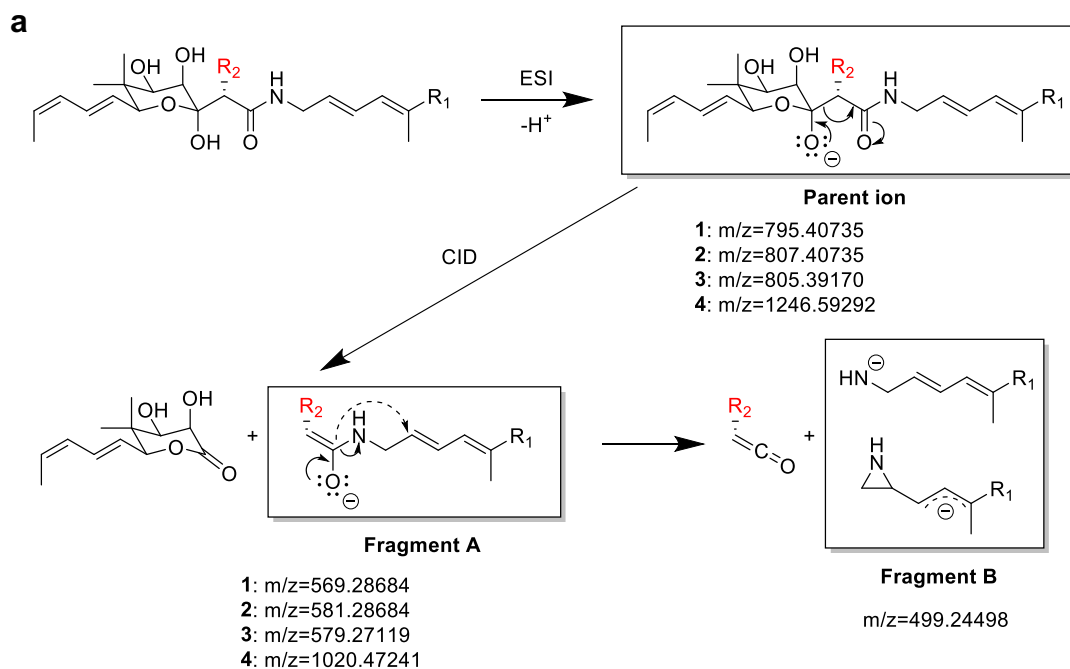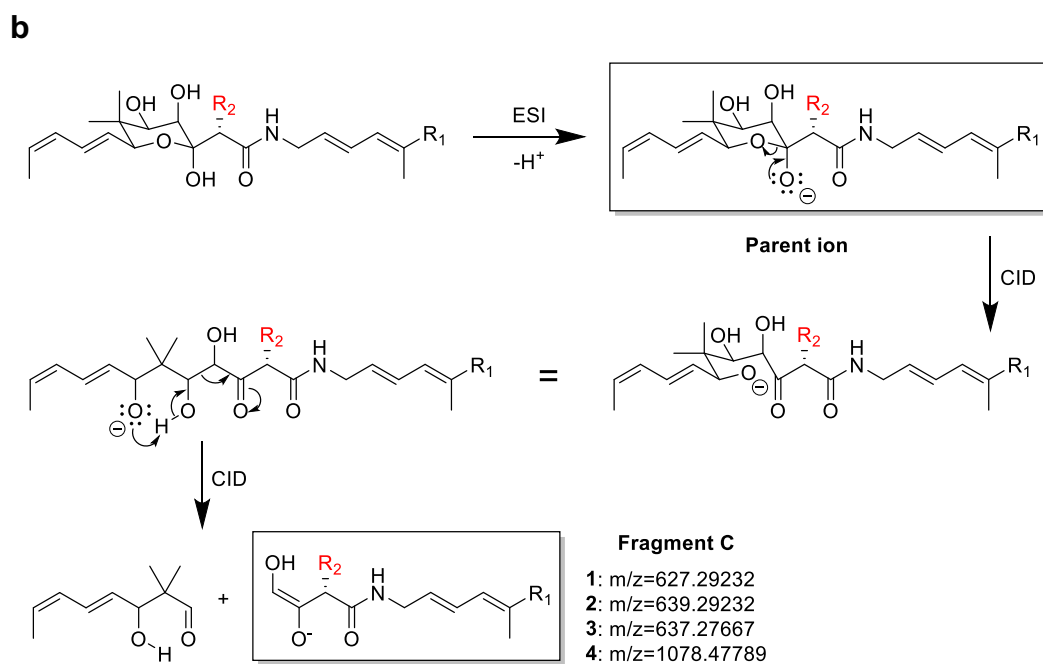

- 1:  $R_2=CH_2CH_3$
- 2:  $R_2=CH_2CHCH_2$
- 3:  $R_2=CH_2CCH$
- 4:  $R_2=$

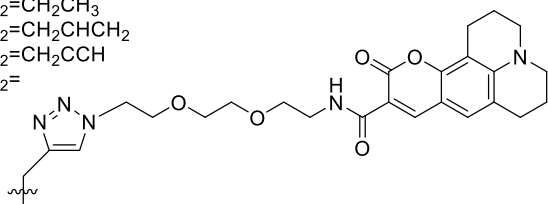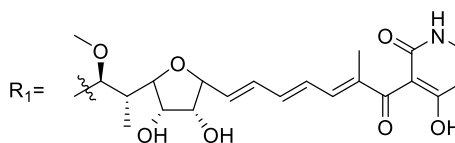

**Supplementary Figure 4.** MS/MS spectra of (a) kirromycin (1), (b) allylkirromycin (2), (c) propargyl-kirromycin (3) and (d) coumarin-kirromycin (4) with annotated fragments A, B and C. The parent ions of the intact chemical compounds are indicated by a “blue diamond”.

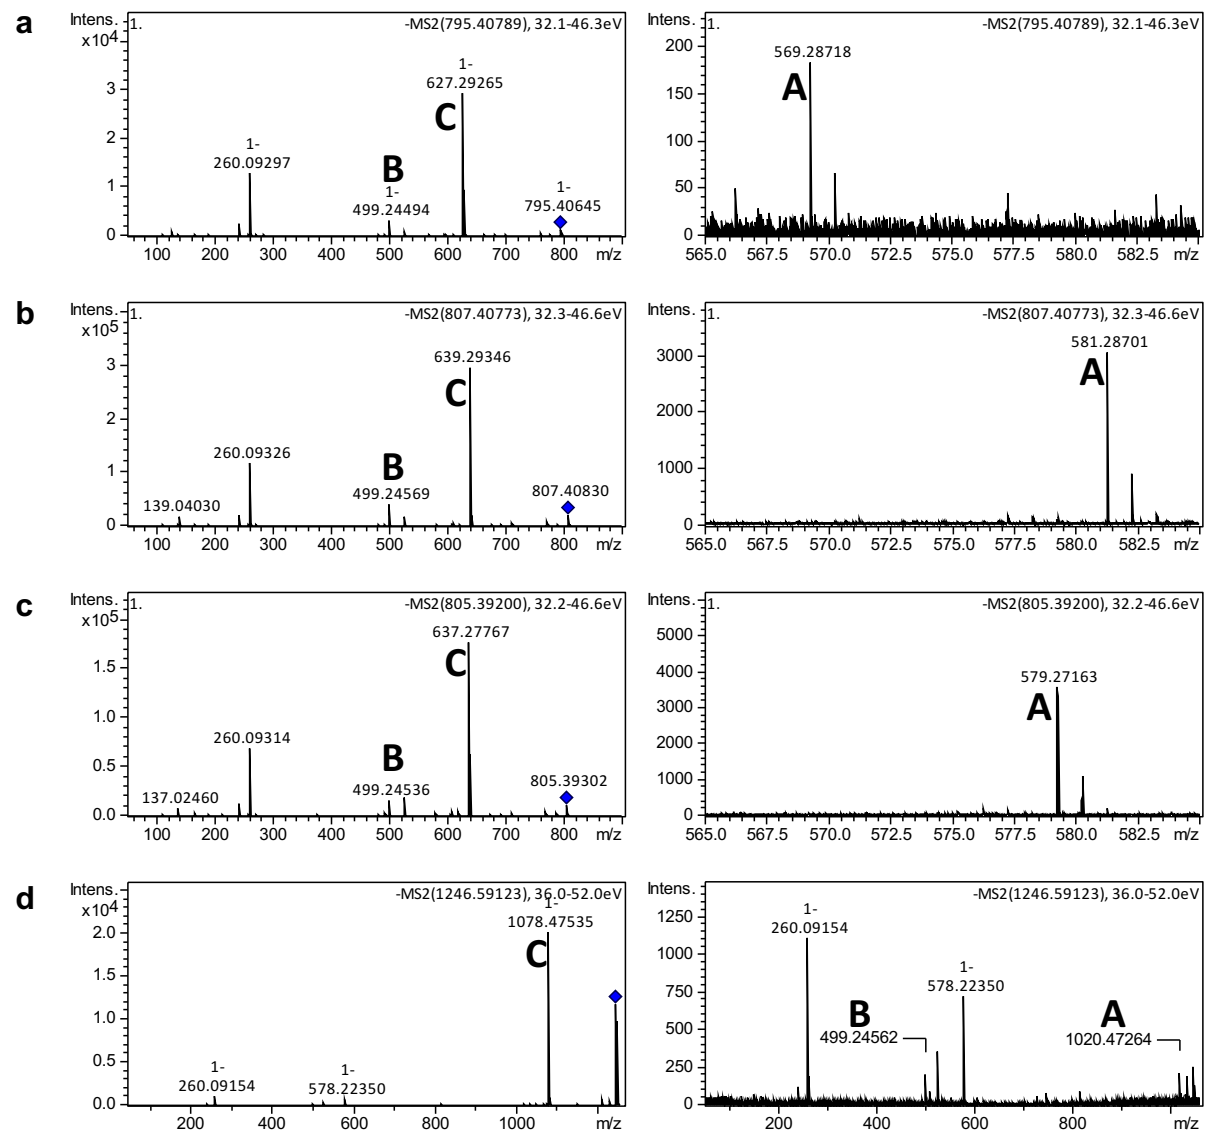

**Supplementary Figure 5.**  $^1\text{H}$  NMR spectra and assignment.

(a)  $^1\text{H}$  NMR spectra and (b)  $^{13}\text{C}$  NMR spectra of allyl-kirromycin (**I**, MeOD, 600 MHz), propargyl-kirromycin (**II**, MeOD, 700 MHz) and coumarin-kirromycin (**III**, MeOD, 700 MHz).



I a)

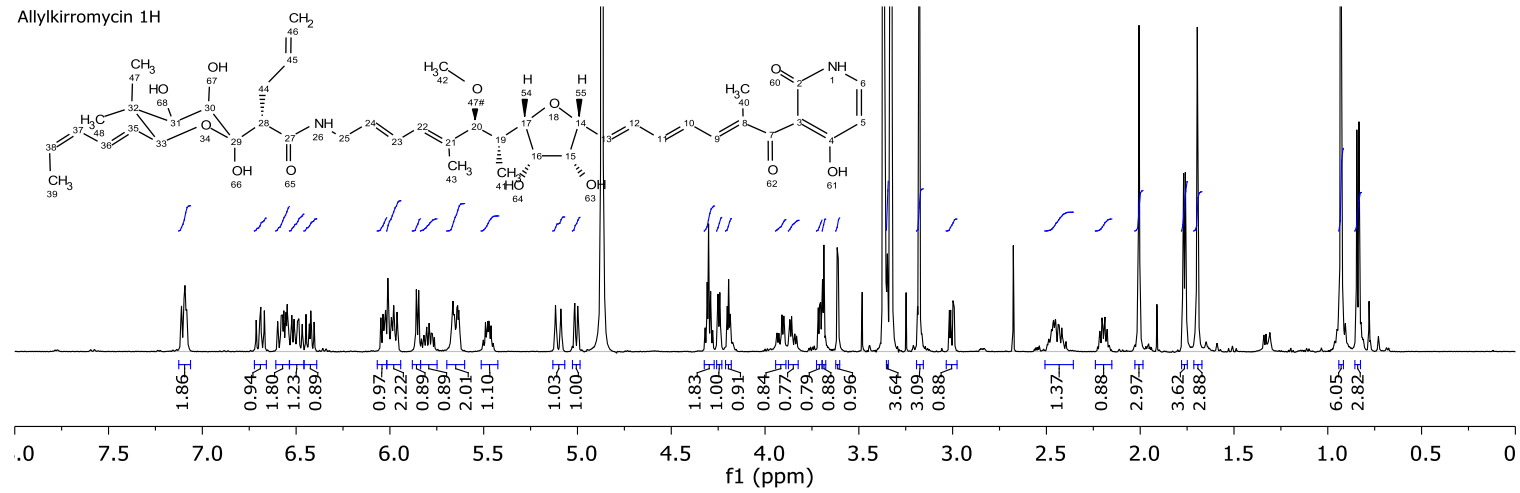

I b)

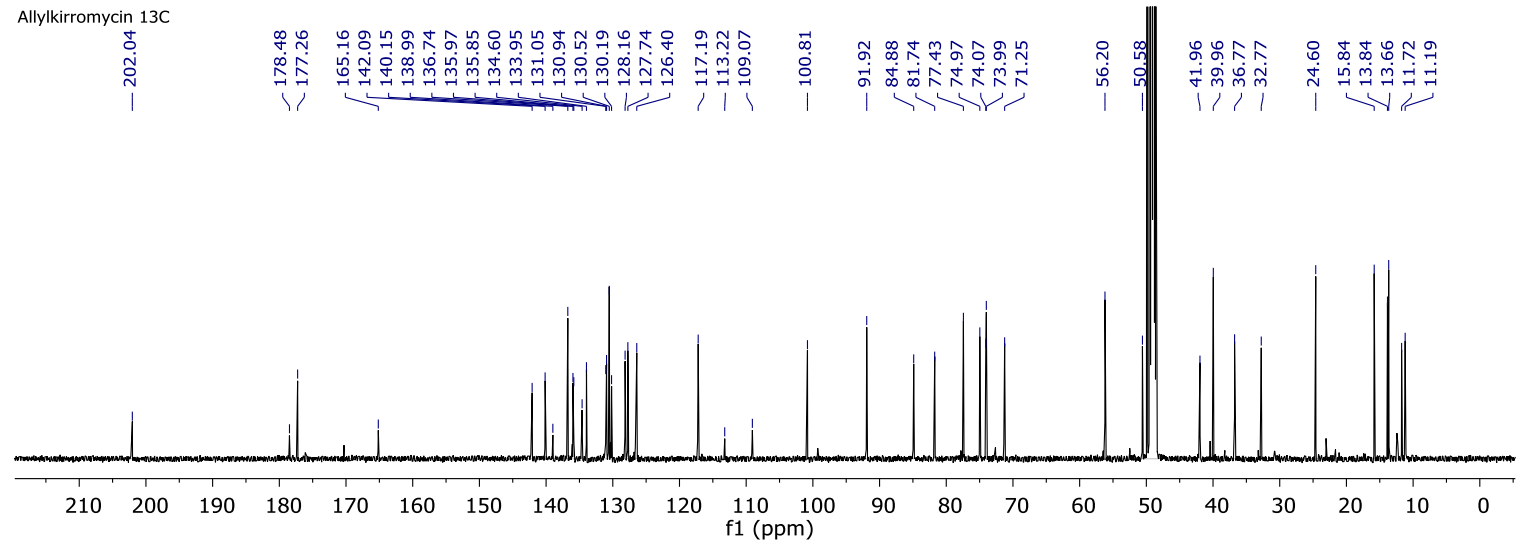

## II a)

Propargylkirromycin 1H

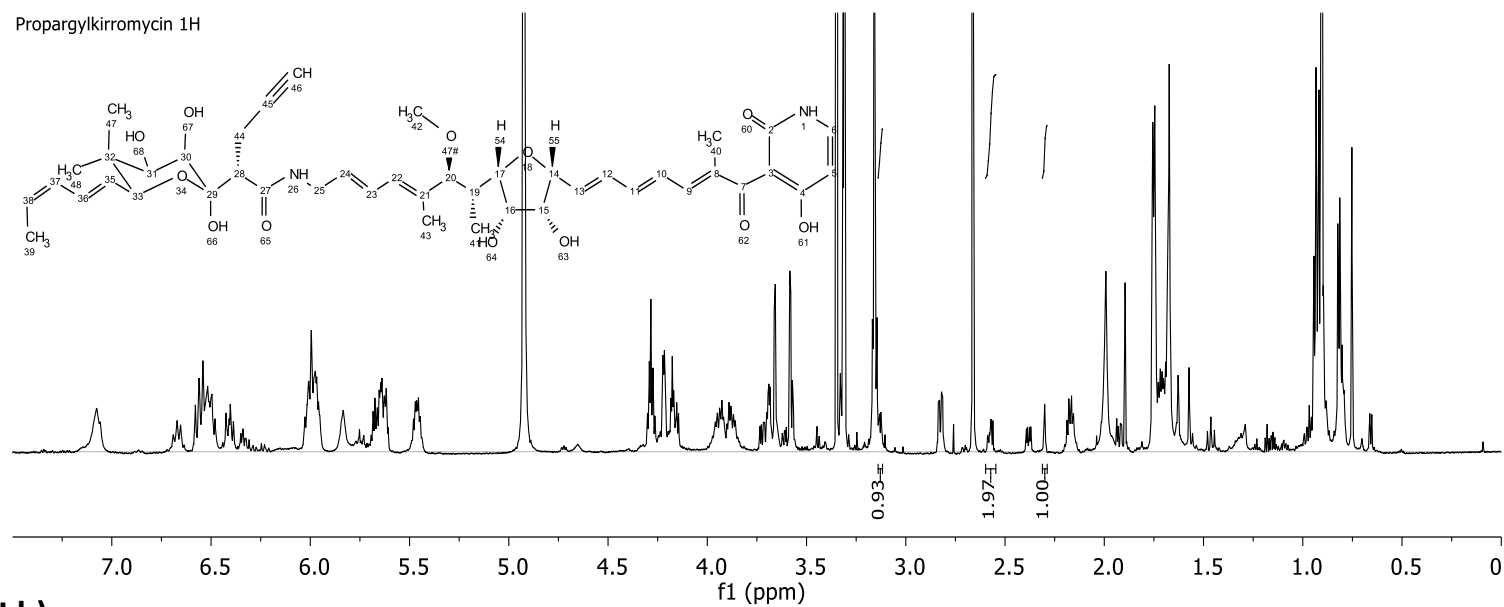

## II b)

Propargylkirromycin 13C

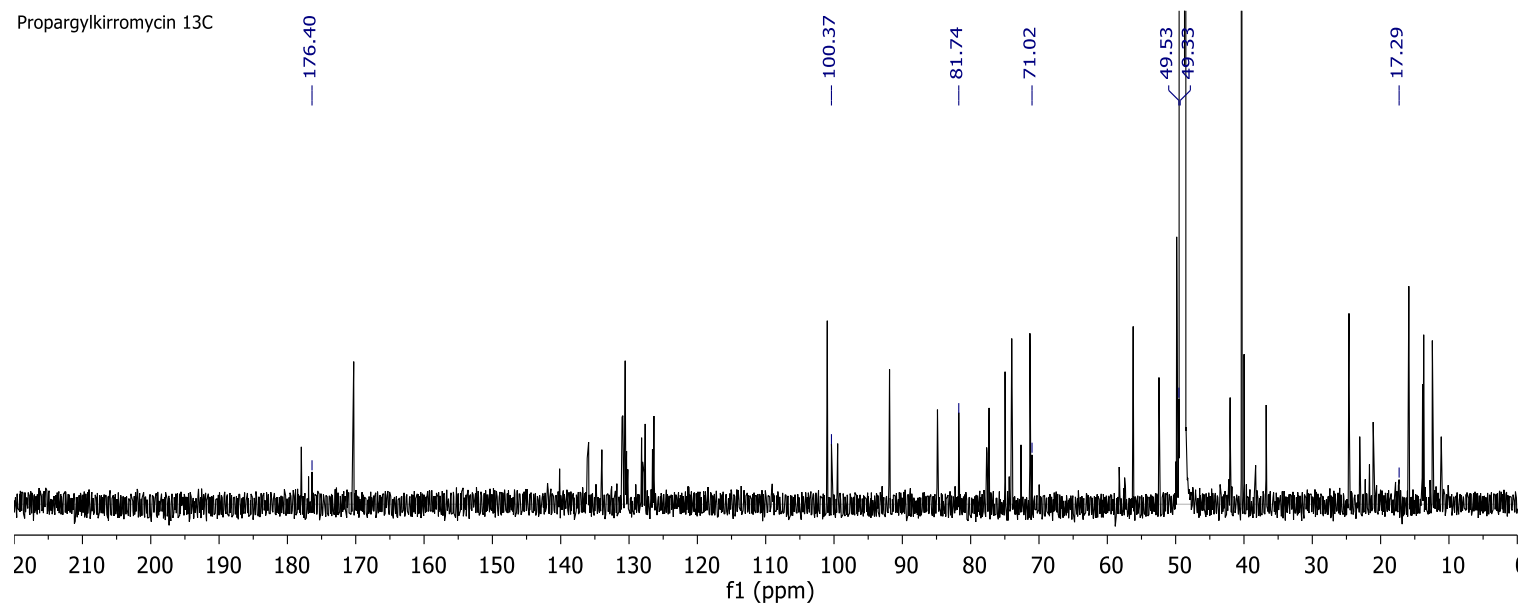

### III a)

Coumarin-Kirromycin 1H

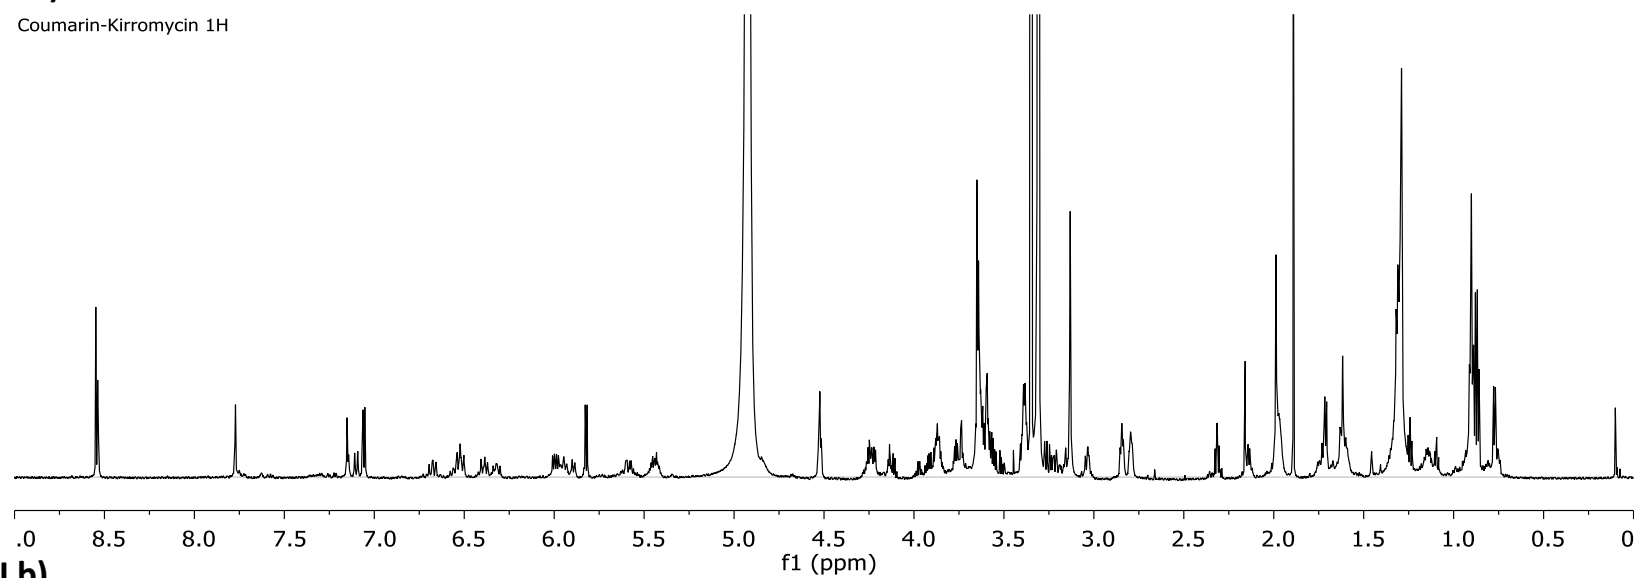

### III b)

Coumarin-Kirromycin 13C

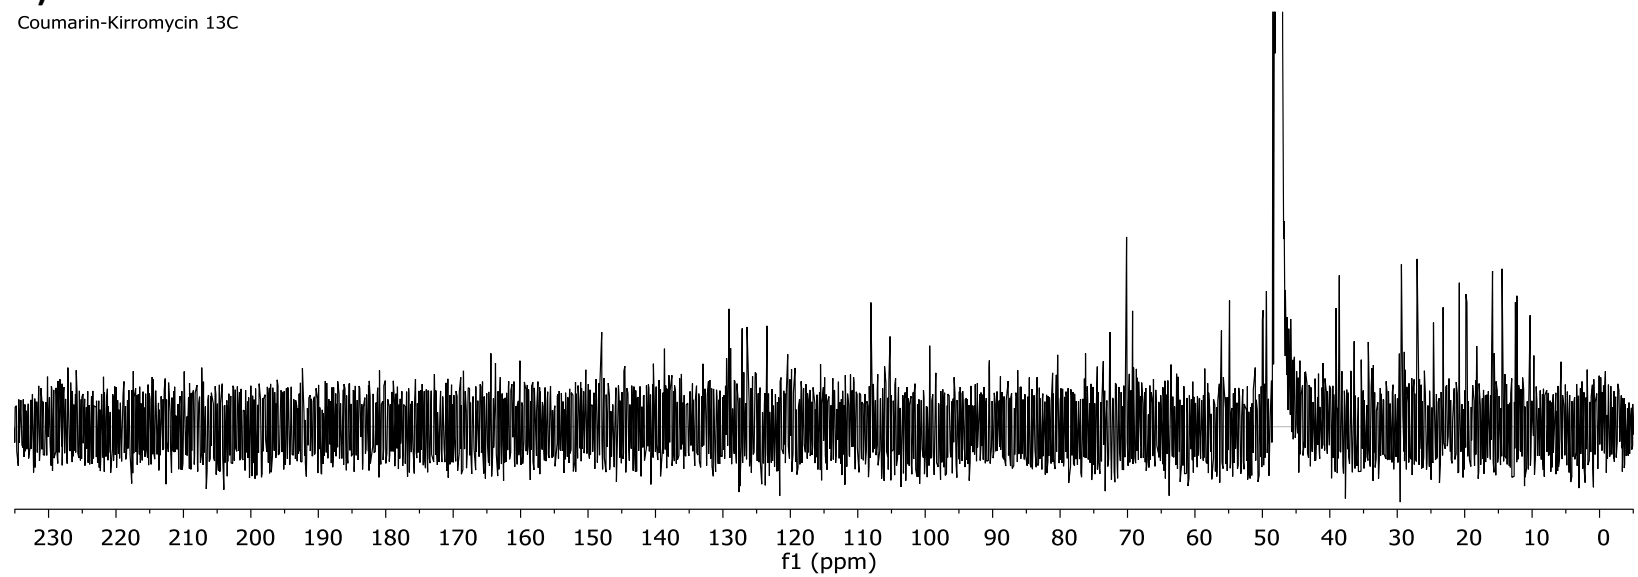

## Supplementary Figure 6. 2D NMR spectra.

(I) 2D NMR spectra of allyl-kirromycin (**2**).

**I a)** 2D NMR spectrum of allyl-kirromycin (**2**),  $^1\text{H}$ - $^1\text{H}$  COSY (homonuclear  $^1\text{H}$ - $^1\text{H}$  correlation spectroscopy), 600 MHz,  $\text{CD}_3\text{OD}$ , 293 K.

**I b)** 2D NMR spectrum of allyl-kirromycin (**2**), HSQC (heteronuclear single quantum correlation), 600 MHz,  $\text{CD}_3\text{OD}$ , 293 K.

**I c)** 2D NMR spectrum of allyl-kirromycin (**2**), HMBC (heteronuclear multiple bond correlation), 600 MHz,  $\text{CD}_3\text{OD}$ , 293 K; key correlations of 44- $\text{H}_2$  ( $\delta_{\text{H}} = 2.44$  ppm) are highlighted in green boxes.

(II) 2D NMR spectra of propargyl-kirromycin (**3**).

**II a)** 2D NMR spectrum of propargyl-kirromycin (**3**),  $^1\text{H}$ - $^1\text{H}$  COSY (homonuclear  $^1\text{H}$ - $^1\text{H}$  correlation spectroscopy), 700 MHz,  $\text{CD}_3\text{OD}$ , 293 K.

**II b)** 2D NMR spectrum of propargyl-kirromycin (**3**), HSQC (heteronuclear single quantum correlation), 700 MHz,  $\text{CD}_3\text{OD}$ , 293 K.

**II c)** 2D NMR spectrum of propargyl-kirromycin (**3**), HMBC (heteronuclear multiple bond correlation), 700 MHz,  $\text{CD}_3\text{OD}$ , 293 K; key correlations of 44- $\text{H}_2$  ( $\delta_{\text{H}} = 2.57$  ppm) are highlighted in green boxes.

(III) 2D NMR spectra of coumarin-kirromycin (**4**), the “click-product”.

$^1\text{H}$ - $^1\text{H}$  COSY (homonuclear  $^1\text{H}$ - $^1\text{H}$  correlation spectroscopy), 700 MHz,  $\text{CD}_3\text{OD}$ , 293 K.

**III a1)** 2D NMR spectrum of coumarin-kirromycin (**4**),  $^1\text{H}$ - $^1\text{H}$  COSY (homonuclear  $^1\text{H}$ - $^1\text{H}$  correlation spectroscopy), 700 MHz,  $\text{CD}_3\text{OD}$ , 293 K.

**III a2)** 2D NMR spectrum of coumarin-kirromycin (**4**),  $^1\text{H}$ - $^1\text{H}$  TOCSY (total spin-spin coupling correlation spectroscopy), 700 MHz,  $\text{CD}_3\text{OD}$ , 293 K.

**III b)** 2D NMR spectrum of coumarin-kirromycin (**4**), HSQC (heteronuclear single quantum correlation), 700 MHz,  $\text{CD}_3\text{OD}$ , 293 K.

**III c)** 2D NMR spectrum of coumarin-kirromycin (**4**), HMBC (heteronuclear multiple bond correlation), 700 MHz,  $\text{CD}_3\text{OD}$ , 293 K; key correlations of 44- $\text{H}_2$  ( $\delta_{\text{H}} = 3.03$  ppm) are highlighted in green boxes.

I a)

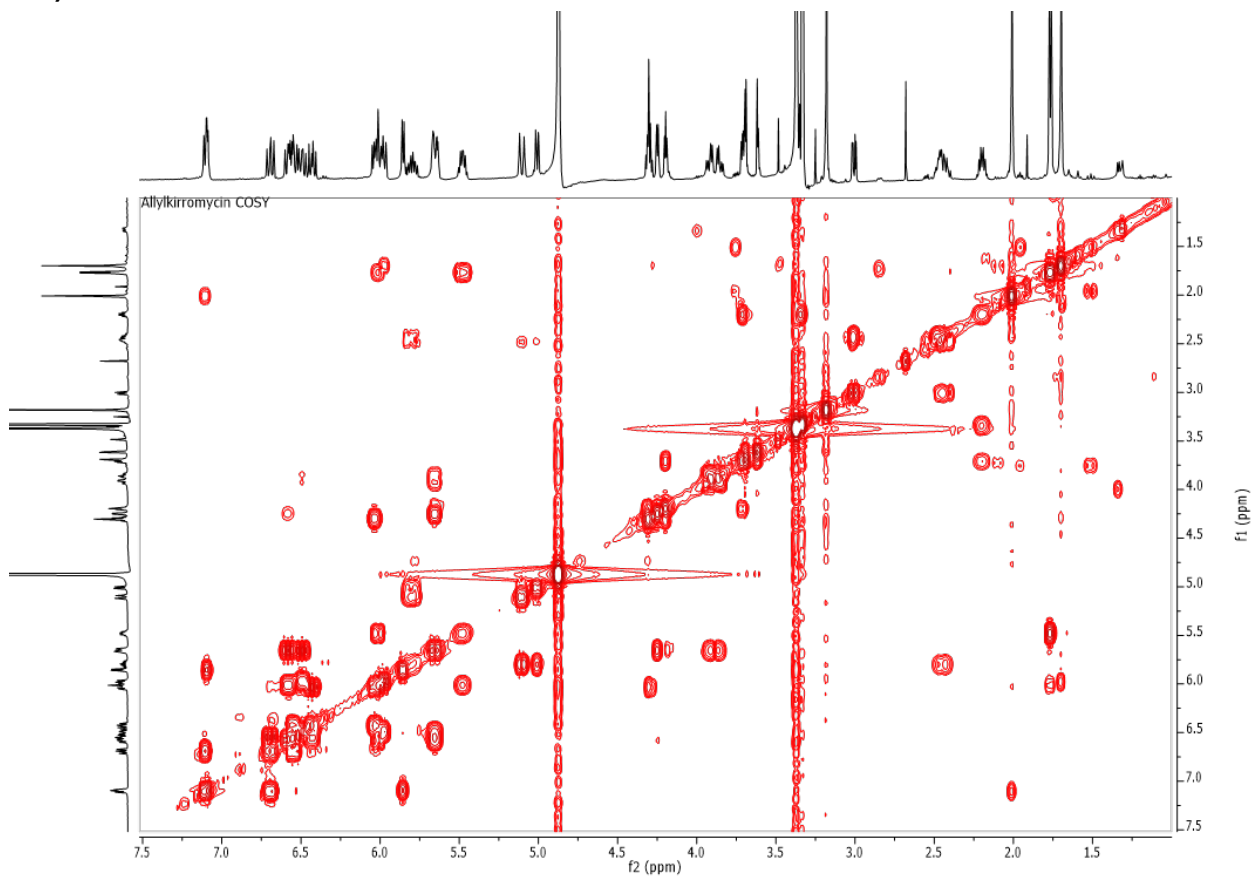

I b)

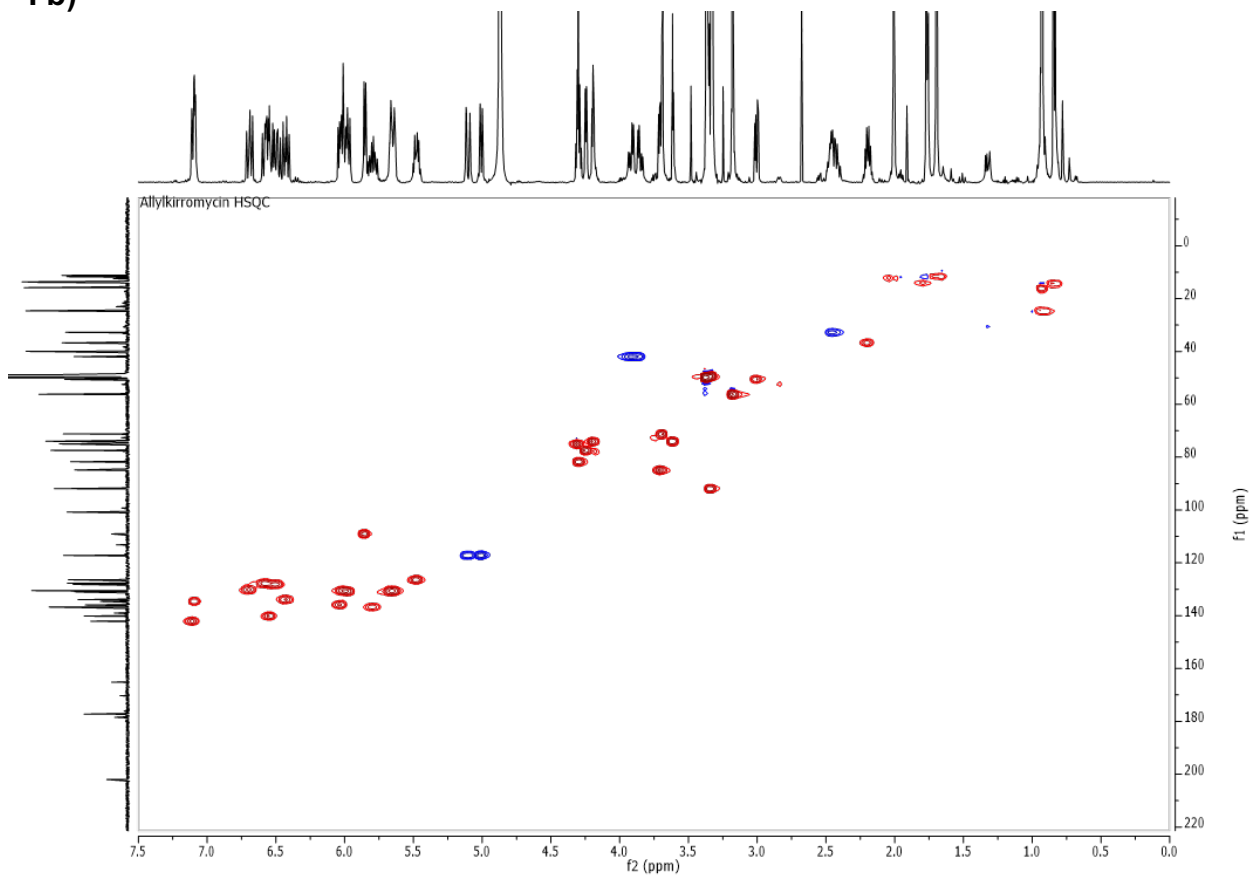

I c)

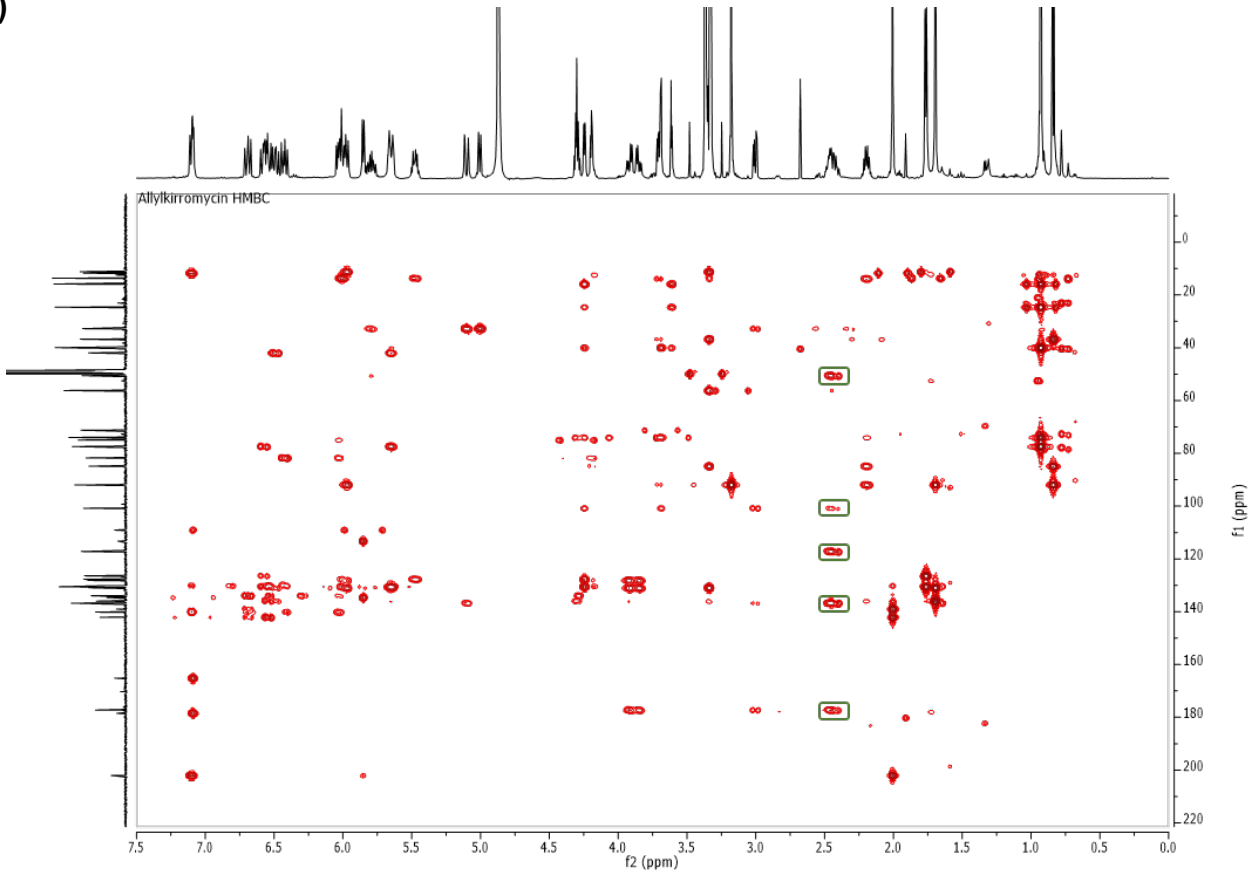

II a)

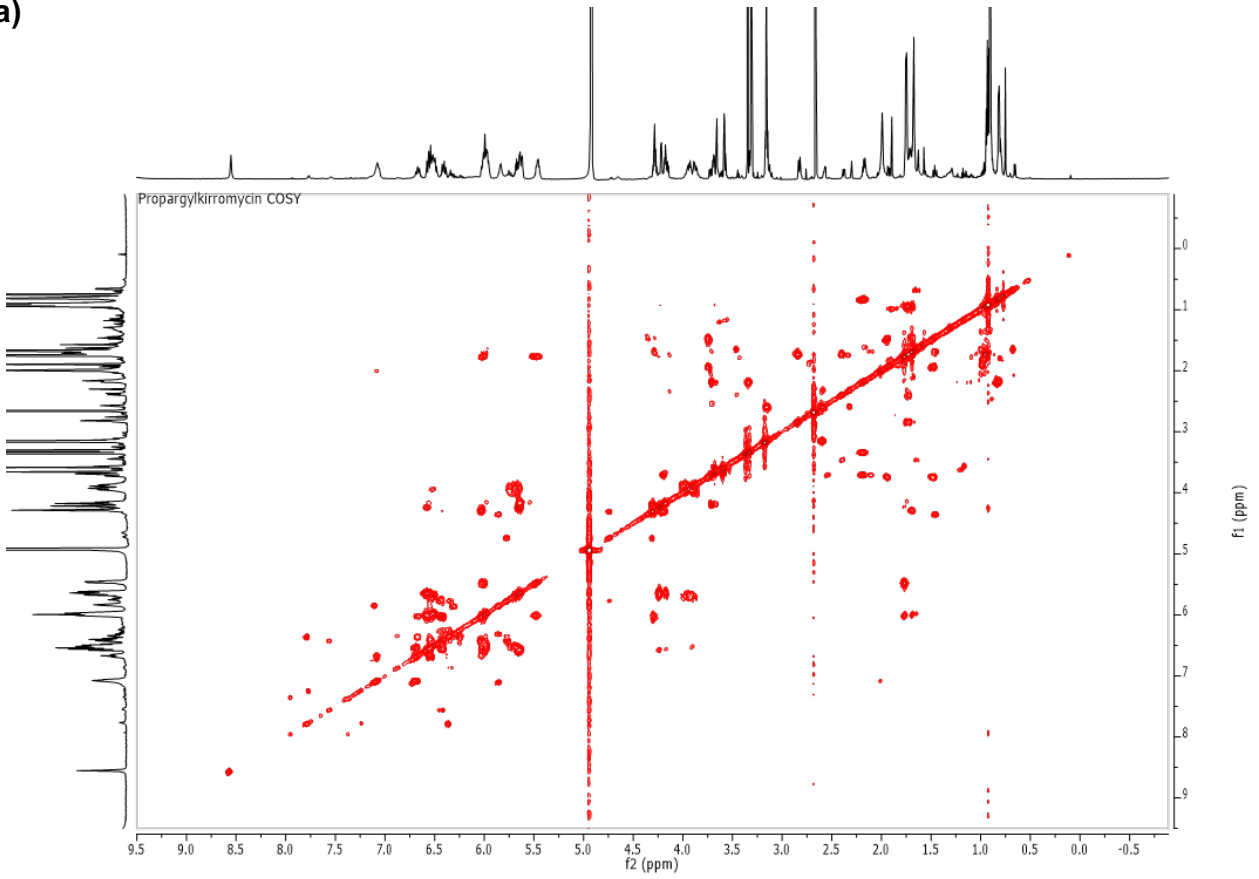

II b)

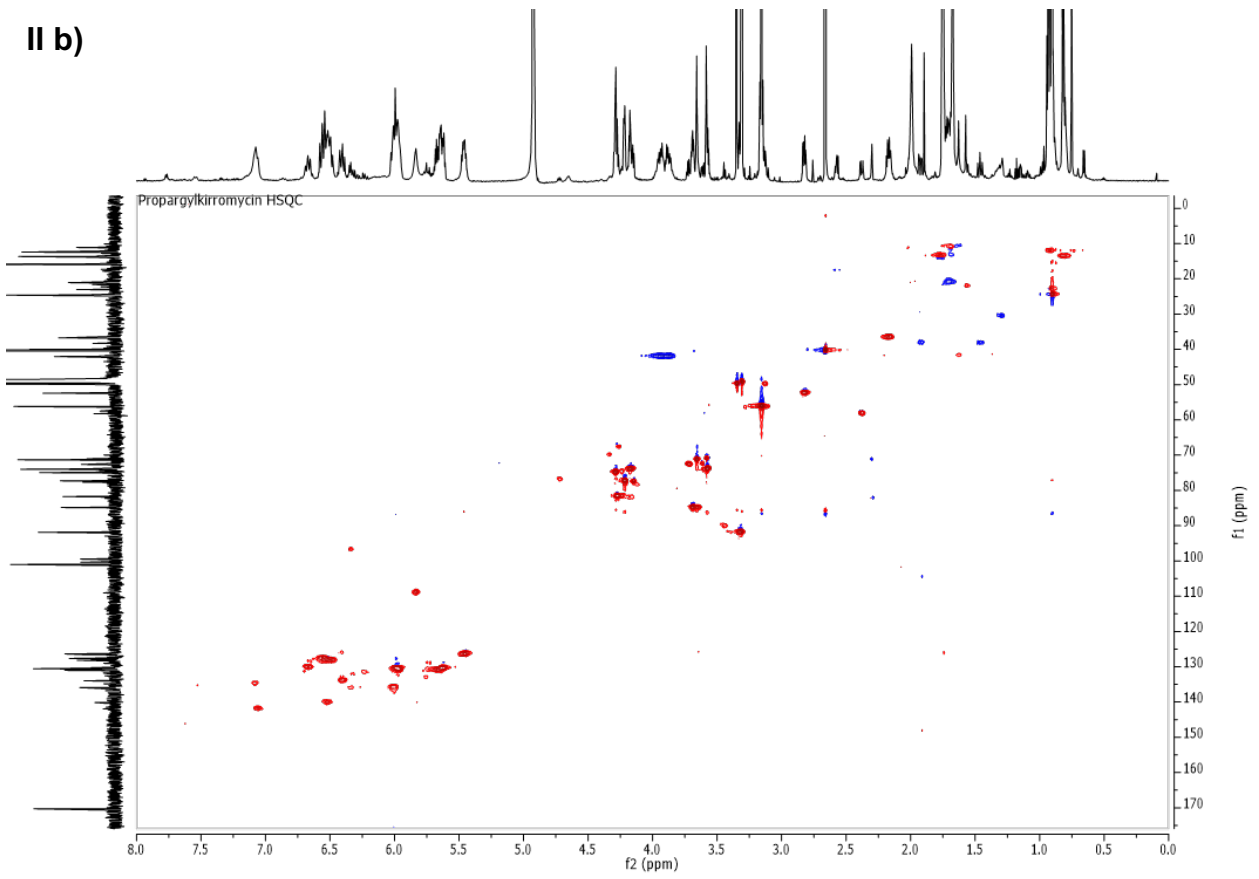

II c)

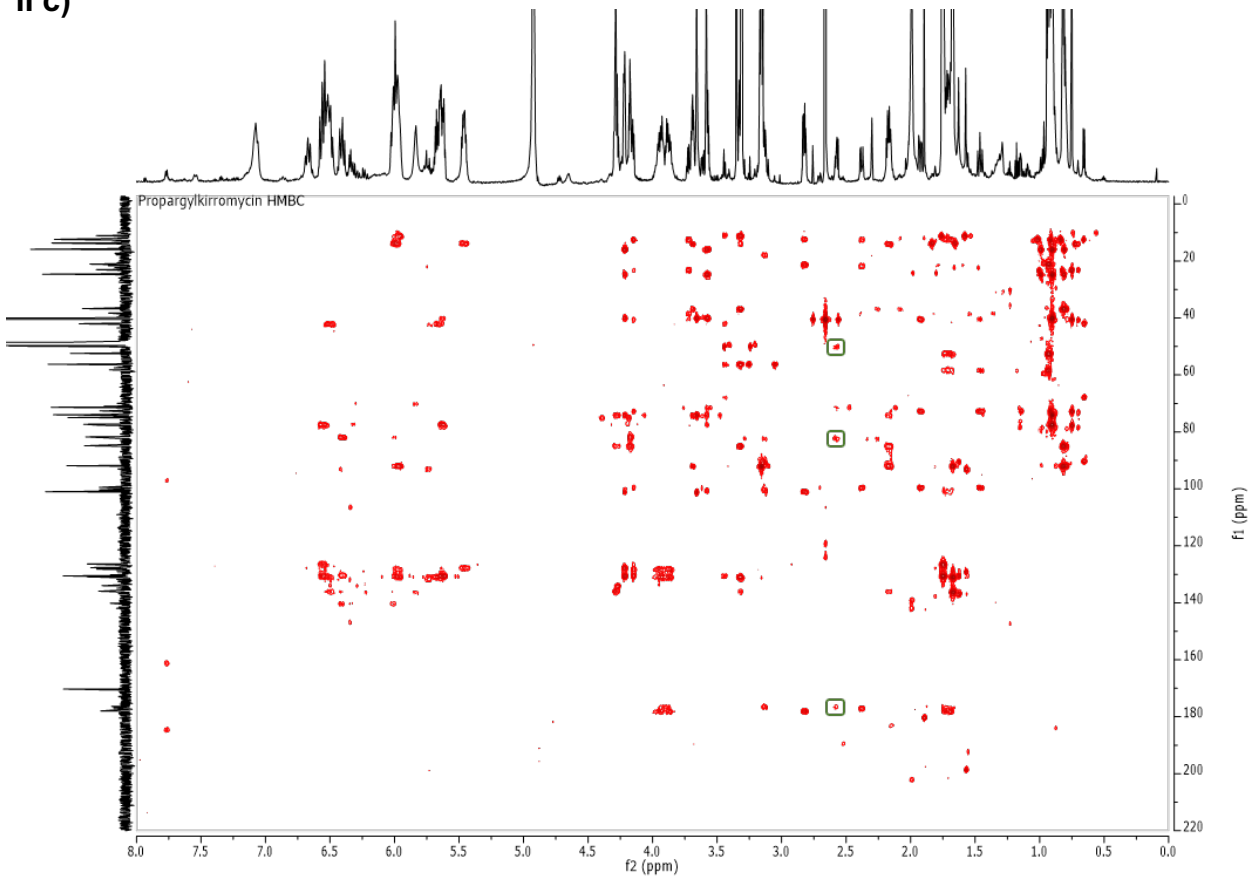

III a1)

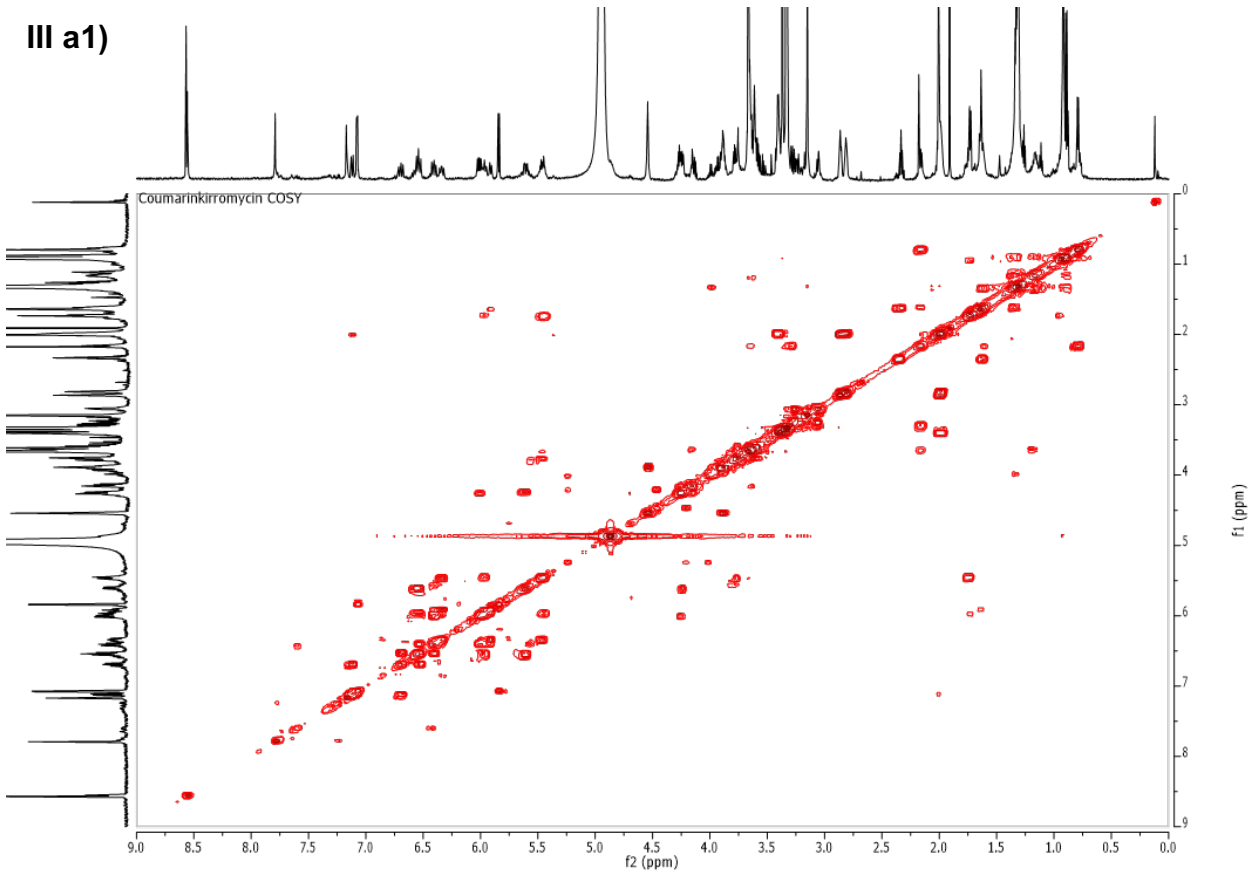

III a2)

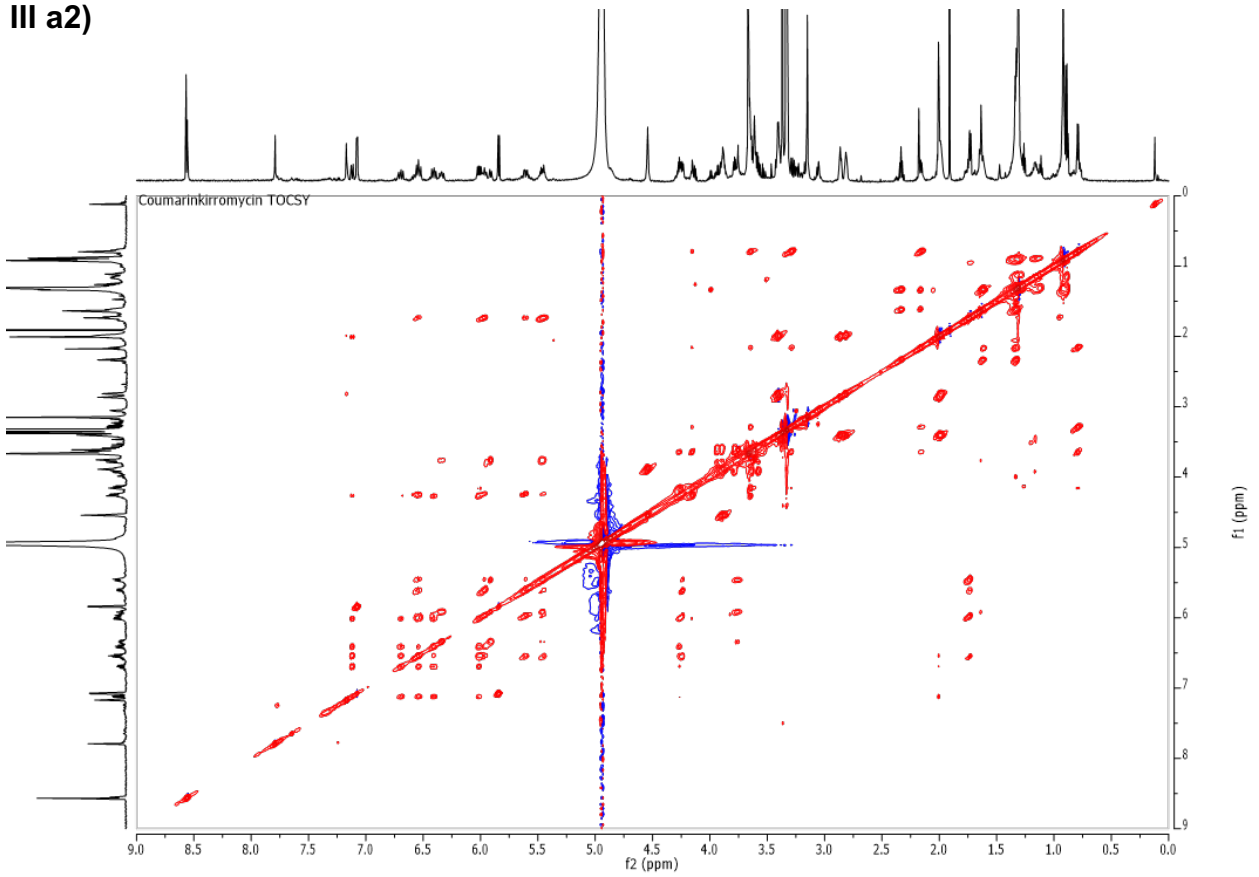



III b)

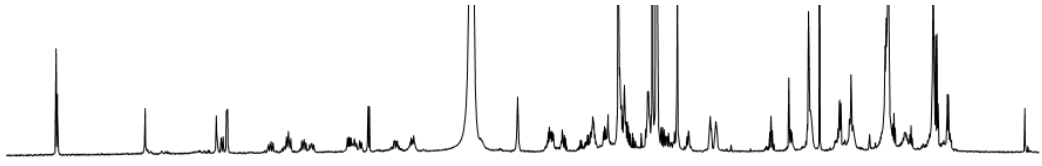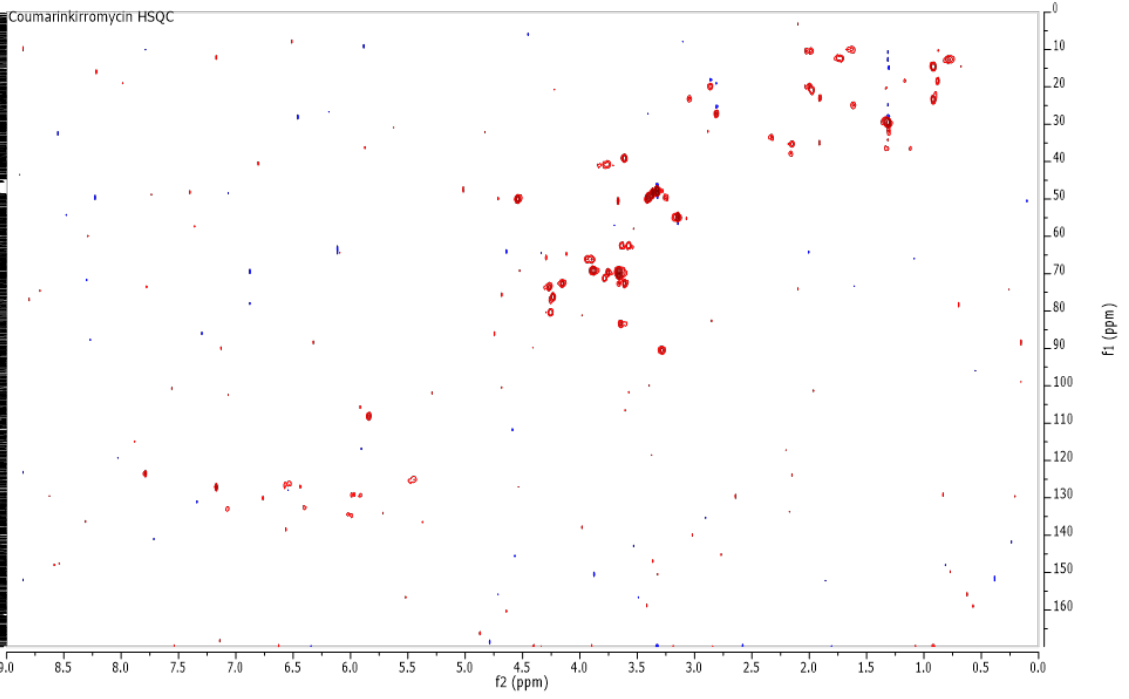

III c)

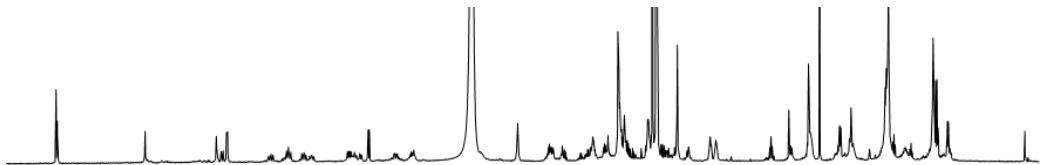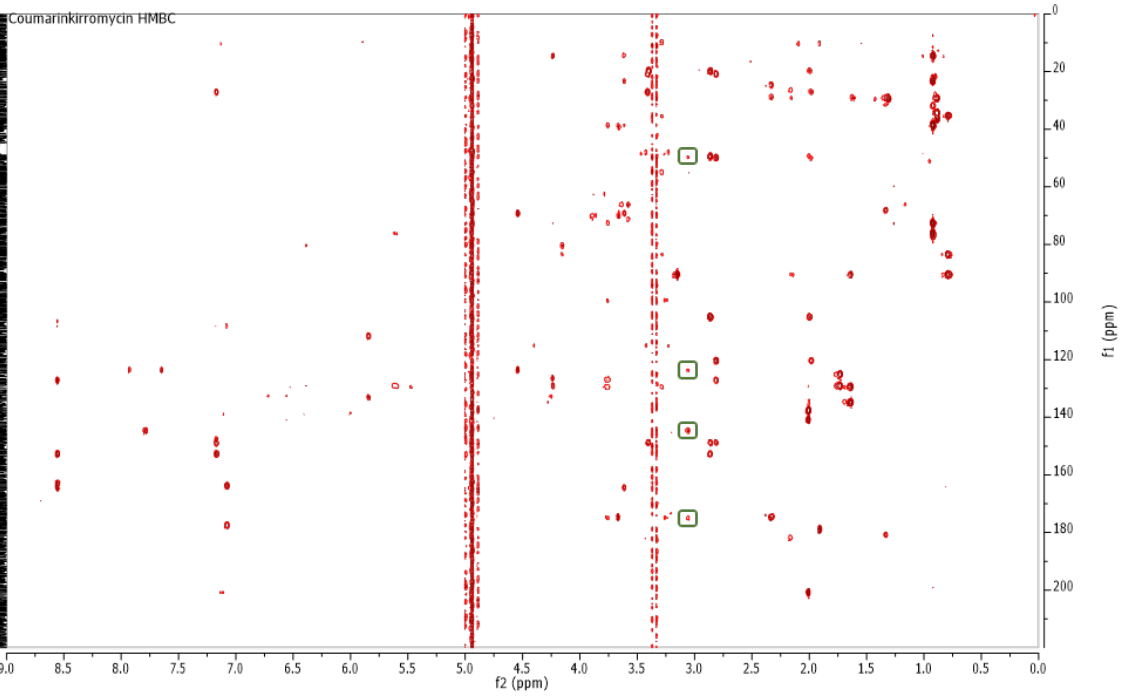

**Supplementary Figure 7.** eGFP based *in vitro* activity assay. (a) Schematic *in vitro* translation of eGFP. (b) Inhibition of eGFP translation caused by kirromycins.

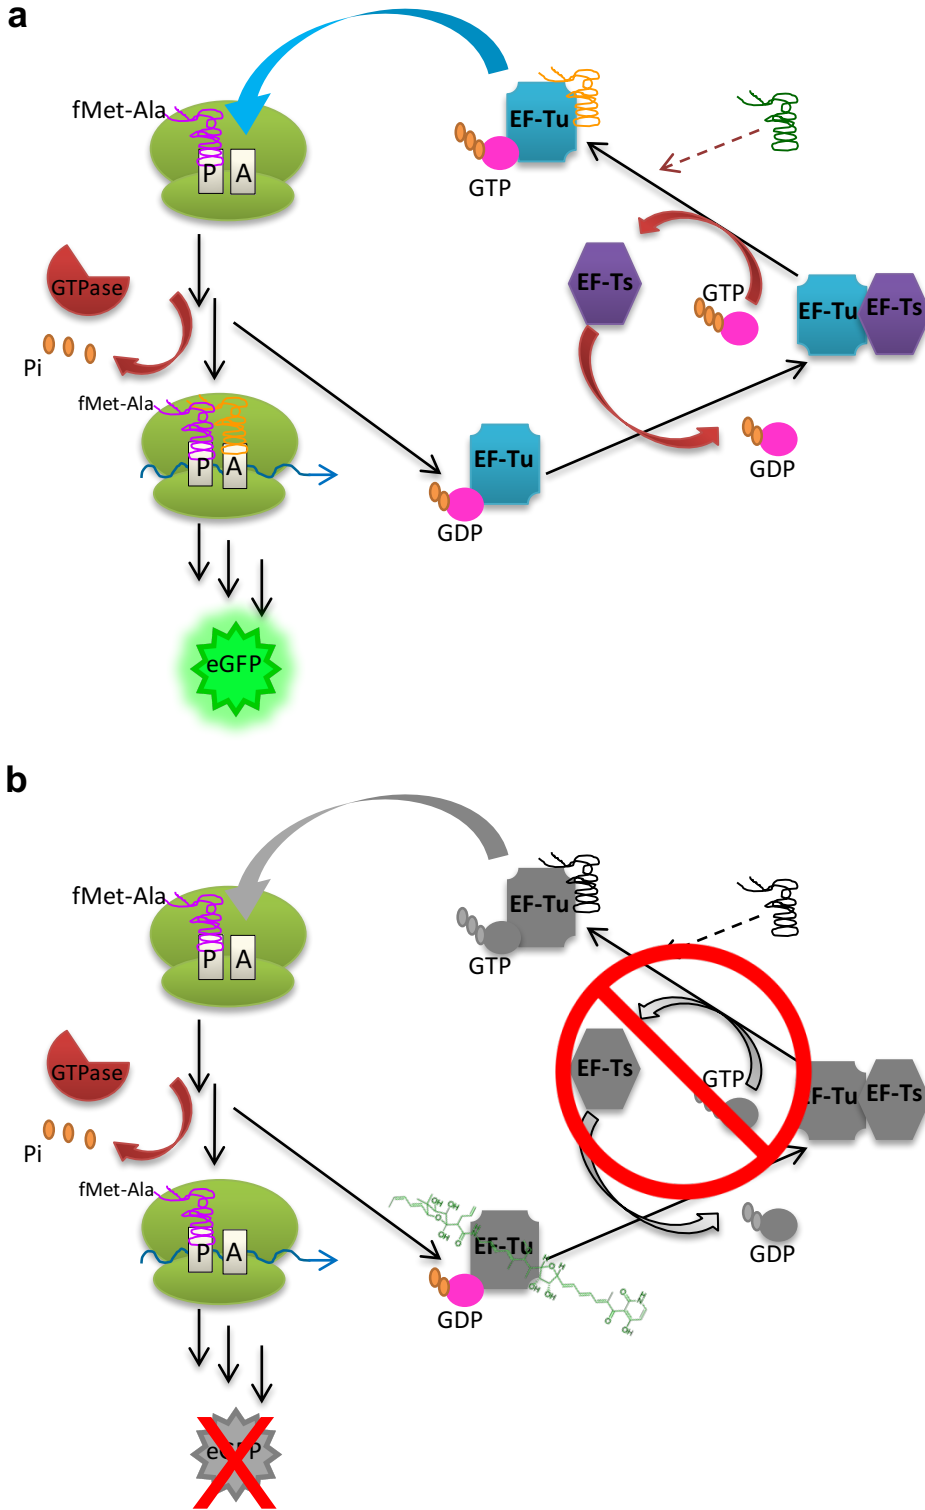

## 2. Supplementary Tables

**Supplementary Table 1.** Calculated and identified masses ( $m/z$ ) of kirromycin (1), allyl-kirromycin (2), propargyl-kirromycin (3) and coumarin-kirromycin (4) and their fragmentation products. The chemical shifts, obtained from nuclear magnetic resonance (NMR) spectroscopy analysis are represented by  $\Delta$  ppm.

| Compound                           |                                | Parent Ion                                                     | Fragment A                                                     | Fragment B                                                    | Fragment C                                                     |
|------------------------------------|--------------------------------|----------------------------------------------------------------|----------------------------------------------------------------|---------------------------------------------------------------|----------------------------------------------------------------|
| <b>Kirromycin</b><br>(1)           | <b>Formula</b>                 | C <sub>43</sub> H <sub>59</sub> N <sub>2</sub> O <sub>12</sub> | C <sub>31</sub> H <sub>41</sub> N <sub>2</sub> O <sub>8</sub>  | C <sub>27</sub> H <sub>35</sub> N <sub>2</sub> O <sub>7</sub> | C <sub>33</sub> H <sub>43</sub> N <sub>2</sub> O <sub>10</sub> |
|                                    | <b>measured</b>                | 795.40788                                                      | 569.28718                                                      | 499.24494                                                     | 627.29265                                                      |
|                                    | <b>calculated</b>              | 795.40735                                                      | 569.28684                                                      | 499.24498                                                     | 627.29232                                                      |
|                                    | <b><math>\Delta</math> ppm</b> | 0.67                                                           | 0.60                                                           | 0.08                                                          | 0.53                                                           |
| <b>Allyl-Kirromycin</b><br>(2)     | <b>Formula</b>                 | C <sub>44</sub> H <sub>59</sub> N <sub>2</sub> O <sub>12</sub> | C <sub>32</sub> H <sub>41</sub> N <sub>2</sub> O <sub>8</sub>  | C <sub>27</sub> H <sub>35</sub> N <sub>2</sub> O <sub>7</sub> | C <sub>34</sub> H <sub>43</sub> N <sub>2</sub> O <sub>10</sub> |
|                                    | <b>measured</b>                | 807.40773                                                      | 581.28701                                                      | 499.24569                                                     | 639.29346                                                      |
|                                    | <b>calculated</b>              | 807.40735                                                      | 581.28684                                                      | 499.24498                                                     | 639.29232                                                      |
|                                    | <b><math>\Delta</math> ppm</b> | 0.47                                                           | 0.30                                                           | 1.44                                                          | 1.78                                                           |
| <b>Propargyl-Kirromycin</b><br>(3) | <b>Formula</b>                 | C <sub>44</sub> H <sub>57</sub> N <sub>2</sub> O <sub>12</sub> | C <sub>32</sub> H <sub>39</sub> N <sub>2</sub> O <sub>8</sub>  | C <sub>27</sub> H <sub>35</sub> N <sub>2</sub> O <sub>7</sub> | C <sub>34</sub> H <sub>41</sub> N <sub>2</sub> O <sub>10</sub> |
|                                    | <b>measured</b>                | 805.39200                                                      | 579.27163                                                      | 499.24536                                                     | 637.27767                                                      |
|                                    | <b>calc.</b>                   | 805.39170                                                      | 579.27119                                                      | 499.24498                                                     | 637.27667                                                      |
|                                    | <b><math>\Delta</math> ppm</b> | 0.38                                                           | 0.77                                                           | 0.77                                                          | 1.58                                                           |
| <b>Coumarin-Kirromycin</b><br>(4)  | <b>Formula</b>                 | C <sub>66</sub> H <sub>84</sub> N <sub>7</sub> O <sub>17</sub> | C <sub>54</sub> H <sub>66</sub> N <sub>7</sub> O <sub>13</sub> | C <sub>27</sub> H <sub>35</sub> N <sub>2</sub> O <sub>7</sub> | C <sub>56</sub> H <sub>68</sub> N <sub>7</sub> O <sub>15</sub> |
|                                    | <b>measured</b>                | 1246.59124                                                     | 1020.47264                                                     | 499.24562                                                     | 1078.47535                                                     |
|                                    | <b>calculated</b>              | 1246.59292                                                     | 1020.47241                                                     | 499.24498                                                     | 1078.47789                                                     |
|                                    | <b><math>\Delta</math> ppm</b> | 1.35                                                           | 0.22                                                           | 1.29                                                          | 2.35                                                           |

**Supplementary Table 2.**  $^1\text{H}$  and  $^{13}\text{C}$  NMR data for kirromycin derivatives.

| Position | Allyl-kirromycin (600 MHz, $\text{CD}_3\text{OD}$ )   |                           | Coumarin-kirromycin (700 MHz, $\text{CD}_3\text{OD}$ ) |                           | Propargyl-kirromycin (700 MHz, $\text{CD}_3\text{OD}$ ) |                           |
|----------|-------------------------------------------------------|---------------------------|--------------------------------------------------------|---------------------------|---------------------------------------------------------|---------------------------|
|          | $\delta_{\text{H}}$ [ppm] (Integral, Type, $J$ in Hz) | $\delta_{\text{C}}$ [ppm] | $\delta_{\text{H}}$ [ppm] (Integral, Type, $J$ in Hz)  | $\delta_{\text{C}}$ [ppm] | $\delta_{\text{H}}$ [ppm] (Integral, Type, $J$ in Hz)   | $\delta_{\text{C}}$ [ppm] |
| 1        | -                                                     | -                         | -                                                      | -                         |                                                         |                           |
| 2        | -                                                     | 165.2                     | -                                                      | n.d.                      |                                                         |                           |
| 3        | -                                                     | 113.2                     | -                                                      | 111.8*                    |                                                         |                           |
| 4        | -                                                     | 178.5                     | -                                                      | n.d.                      |                                                         |                           |
| 5        | 5.85, 1H, d, $J = 7.4$                                | 109.1                     | 5.82, 1H, d, $J = 7.4$                                 | 108.1                     |                                                         |                           |
| 6        | 7.10, 1H, d, $J = 7.4$                                | 134.6                     | 7.06, 1H, d, $J = 7.4$                                 | 132.9*                    |                                                         |                           |
| 7        | -                                                     | 202.0                     | -                                                      | 200.8*                    |                                                         |                           |
| 8        | -                                                     | 139.0                     | -                                                      | n.d.                      |                                                         |                           |
| 9        | 7.10, 1H, d, $J = 11.1$                               | 142.1                     | 7.10, 1H, d, $J = 11.6$                                | n.d.                      |                                                         |                           |
| 10       | 6.69, 1H, dd, $J = 14.7, 11.4$                        | 130.2                     | 6.68, 1H, dd, $J = 11.5, 15.0$                         | n.d.                      |                                                         |                           |
| 11       | 6.55, 1H, m (with 36)                                 | 140.2                     | 6.52, 1H, m (with 36)                                  | n.d.                      |                                                         |                           |
| 12       | 6.43, 1H, dd, $J = 15.2, 10.7$                        | 134.0                     | 6.39, 1H, m                                            | n.d.                      |                                                         |                           |
| 13       | 6.03, 1H, m (with 22, 37)                             | 135.9                     | 6.00, m                                                | n.d.                      |                                                         |                           |
| 14       | 4.29, 1H, m (with 15)                                 | 81.7                      | 4.24, m                                                | n.d.                      |                                                         |                           |
| 15       | 4.31, 1H, m (with 14)                                 | 75.0                      | n. a.                                                  | n.a.                      |                                                         |                           |
| 16       | 4.19, 1H, dd, $J = 4.5, 4.1$                          | 74.1                      | n. a.                                                  | n.a.                      |                                                         |                           |
| 17       | 3.71, 1H, dd, $J = 7.3, 4.1$                          | 84.9                      | 3.64, m                                                | n.d.                      |                                                         |                           |
| 18       | -                                                     | -                         | -                                                      | -                         |                                                         |                           |
| 19       | 2.20, 1H, m                                           | 36.8                      | 2.14, 1H, m                                            | 36.4*                     |                                                         |                           |
| 20       | 3.35, 1H, m (Überlappung mit MeOD)                    | 91.9                      | 3.27, 1H, m                                            | n.d.                      |                                                         |                           |
| 21       | -                                                     | 136.0                     | -                                                      | n.d.                      |                                                         |                           |
| 22       | 5.99, 1H, m (with 13, 37)                             | 131.1                     | 5.89, 1H, d, 10.2                                      | n.d.                      |                                                         |                           |
| 23       | 6.50, 1H, m                                           | 128.2                     | 6.32, 1H, m                                            | n.d.                      |                                                         |                           |

| Position | Allyl-kirromycin (600 MHz, CD <sub>3</sub> OD) |                  | Coumarin-kirromycin (700 MHz, CD <sub>3</sub> OD) |                  | Propargyl-kirromycin (700 MHz, CD <sub>3</sub> OD) |                  |
|----------|------------------------------------------------|------------------|---------------------------------------------------|------------------|----------------------------------------------------|------------------|
|          | $\delta_H$ [ppm] (Integral, Type, J in Hz)     | $\delta_C$ [ppm] | $\delta_H$ [ppm] (Integral, Type, J in Hz)        | $\delta_C$ [ppm] | $\delta_H$ [ppm] (Integral, Type, J in Hz)         | $\delta_C$ [ppm] |
| 24       | 5.65, 1H, m (with 35)                          | 130.5 (with 37)  | 5.44, 1H, m (with 38)                             | n.d.             |                                                    |                  |
| 25a      | 3.85, 1H, dd, $J = 15.8, 5.9$                  | 42.0             | 3.75, m                                           | 40.8*            |                                                    |                  |
| 25b      | 3.92, 1H, dd, $J = 15.8, 6.2$                  |                  |                                                   |                  |                                                    |                  |
| 26       | -                                              | -                | -                                                 | -                |                                                    |                  |
| 27       | -                                              | 177.3            | -                                                 | 174.9*           | -                                                  | 176.4            |
| 28       | 3.00, 1H, dd, $J = 11.4, 4.1$                  | 50.6             | 3.23, 1H, dd, $J = 10.6, 5.2$                     | 49.6*            | 3.13, 1H, m                                        | 49.5             |
| 29       | -                                              | 100.8            | -                                                 | 99.3             | -                                                  | 100.4            |
| 30       | 3.69, 1H, d, $J = 3.6$                         | 71.3             | n. a.                                             | n. d.            |                                                    |                  |
| 31       | 3.61, 1H, d, $J = 3.6$                         | 74.0             | n. a.                                             | n. d.            |                                                    |                  |
| 32       | -                                              | 40.0             | n. a.                                             | n. d.            |                                                    |                  |
| 33       | 4.25, 1H, d, $J = 5.8$                         | 77.4             | 4.24, m                                           | 76.1*            |                                                    |                  |
| 34       | -                                              | -                | -                                                 | -                |                                                    |                  |
| 35       | 5.65, 1H, m (with 24)                          | 130.9            | 5.59, 1H, m                                       | n.d.             |                                                    |                  |
| 36       | 6.57, 1H, m (with 11)                          | 127.7            | 6.54, 1H, m (with 11)                             | 126.4            |                                                    |                  |
| 37       | 6.01, 1H, m (with 13, 22)                      | 130.5 (with 24)  | 5.97, m                                           | 129.1*           |                                                    |                  |
| 38       | 5.48, 1H, m                                    | 126.4            | 5.44, 1H, m (with 24)                             | 125.0*           |                                                    |                  |
| 39       | 1.76, 3H, dd, $J = 7.2, 1.7$                   | 13.7             | 1.71, 3H, dd, $J = 1.5, 7.1$                      | 12.5             |                                                    |                  |
| 40       | 2.01, 3H, s                                    | 11.7             | 1.99, s                                           | 10.3             |                                                    |                  |
| 41       | 0.83, 2H, d, $J = 6.9$                         | 13.8             | 0.77, 1H, d, $J = 6.9$                            | 12.3             |                                                    |                  |
| 42       | 3.18, 3H, s                                    | 56.2             | 3.13, 3H, s                                       | 54.9             |                                                    |                  |
| 43       | 1.70, 3H, s                                    | 11.2             | 1.64, 3H, s                                       | 9.9              |                                                    |                  |
| 44       | 2.44, 2H, m                                    | 32.8             | 3.03, <2H, m                                      | 23.0             | 2.57, 2H, m                                        | 17.8             |
| 45       | 5.80, 1H, m                                    | 136.7            | -                                                 | 144.6*           | -                                                  | 81.7             |
| 46a      | 5.10, 1H, dm, $J = 17.3$                       | 117.2            | 7.78, 1H, s                                       | 123.5            | 2.30, 1H, t, $J = 2.64$                            | 71.0             |
| 46b      | 5.01, 1H, dm, $J = 10.2$                       |                  |                                                   |                  |                                                    |                  |
| 47       | 0.93, 3H, s (with 47)                          | 15.8             | 0.91, s                                           | 14.5             |                                                    |                  |

| Position | Allyl-kirromycin (600 MHz, CD <sub>3</sub> OD) |                  | Coumarin-kirromycin (700 MHz, CD <sub>3</sub> OD) |                  | Propargyl-kirromycin (700 MHz, CD <sub>3</sub> OD) |                  |
|----------|------------------------------------------------|------------------|---------------------------------------------------|------------------|----------------------------------------------------|------------------|
|          | $\delta_H$ [ppm] (Integral, Type, J in Hz)     | $\delta_C$ [ppm] | $\delta_H$ [ppm] (Integral, Type, J in Hz)        | $\delta_C$ [ppm] | $\delta_H$ [ppm] (Integral, Type, J in Hz)         | $\delta_C$ [ppm] |
| 48       | 0.93, 1H, s (with 48)                          | 24.6             | 0.91, s                                           | 23.2             |                                                    |                  |
| 1'       |                                                |                  | 4.52, 2H, t, J = 5.1 Hz                           | 50.0             |                                                    |                  |
| 2'       |                                                |                  | 3.89, m                                           | 69.1             |                                                    |                  |
| 3'       |                                                |                  | n. a.                                             | n. a.            |                                                    |                  |
| 4'       |                                                |                  | n. a.                                             | n. a.            |                                                    |                  |
| 5'       |                                                |                  | n. a.                                             | n. a.            |                                                    |                  |
| 6'       |                                                |                  | n. a.                                             | n. a.            |                                                    |                  |
| 7'       |                                                |                  | -                                                 | n. d.            |                                                    |                  |
| 1''      |                                                |                  | -                                                 | n.d.             |                                                    |                  |
| 2''      |                                                |                  | -                                                 | n.d.             |                                                    |                  |
| 3''      |                                                |                  | 8.55, 1H, s                                       | n.d.             |                                                    |                  |
| 4''      |                                                |                  | -                                                 | n.d.             |                                                    |                  |
| 5''      |                                                |                  | 7.17, 1H, s                                       | 127.1*           |                                                    |                  |
| 6''      |                                                |                  | -                                                 | 120.4            |                                                    |                  |
| 7''      |                                                |                  | -                                                 | 148.8*           |                                                    |                  |
| 8''      |                                                |                  | -                                                 | 105.2            |                                                    |                  |
| 9''      |                                                |                  | -                                                 | 152.7*           |                                                    |                  |
| 10''     |                                                |                  | 2.79, 2H, m                                       | 27.1             |                                                    |                  |
| 11''     |                                                |                  | 1.99, m (with 14'')                               | 20.8             |                                                    |                  |
| 12''     |                                                |                  | 3.41, m                                           | 49.9             |                                                    |                  |
| 13''     |                                                |                  | 3.40, m                                           | 49.4             |                                                    |                  |
| 14''     |                                                |                  | 1.99 (with 11'')                                  | 19.8             |                                                    |                  |
| 15''     |                                                |                  | 2.84, 2H, t, 6.3                                  | 19.7             |                                                    |                  |

\* <sup>13</sup>C shift determined by HSQC or HMBC

n.d.: not detected

n.a.: not assigned

**Supplementary Tables 3 a-b.** Raw data of the *in vitro* translation assay. Measurement of eGFP fluorescence by increasing amounts of (a) kirromycin (**1**), allyl-kirromycin (**2**) and coumarin-kirromycin (**3**), and (b) control reactions with kirromycin (concentration range 1-0.1 $\mu$ M). The measurements were carried out

**a**

| c [ $\mu$ M]                          | 10.00                                 | 6.67                                  | 4.44  | 2.96  | 1.98  | 1.32  | 0.88  | 0.59  | 0.39  | 0.26  | 0.17  | 0.12  |                     |            |                  |
|---------------------------------------|---------------------------------------|---------------------------------------|-------|-------|-------|-------|-------|-------|-------|-------|-------|-------|---------------------|------------|------------------|
| Fluorescence signal [arbitrary units] | 28748                                 | 35372                                 | 41078 | 48216 | 50508 | 56118 | 55326 | 58603 | 59447 | 59217 | 62123 | 64231 | coumarin-kirromycin |            |                  |
|                                       | 21311                                 | 20285                                 | 38406 | 40247 | 46745 | 48831 | 48754 | 52139 | 53625 | 50911 | 56702 | 55784 |                     |            |                  |
|                                       | 7520                                  | 18182                                 | 21889 | 29525 | 28825 | 44081 | 47624 | 45626 | 45479 | 46953 | 46574 | 51266 |                     |            |                  |
|                                       | Fluorescence signal [arbitrary units] | 167                                   | 369   | 841   | 3302  | 6245  | 12173 | 18263 | 26644 | 30548 | 32105 | 35447 | 33099               | kirromycin |                  |
|                                       |                                       | 132                                   | 266   | 864   | 2933  | 5974  | 11301 | 17082 | 25062 | 28566 | 31418 | 32613 | 36570               |            |                  |
|                                       |                                       | 126                                   | 264   | 608   | 2601  | 5541  | 10810 | 16619 | 25124 | 26352 | 31600 | 33500 | 35742               |            |                  |
|                                       |                                       | Fluorescence signal [arbitrary units] | 112   | 223   | 1084  | 3593  | 8477  | 16907 | 21284 | 29006 | 34125 | 35576 | 37545               | 39608      | allyl-kirromycin |
|                                       |                                       |                                       | 135   | 227   | 920   | 3036  | 7583  | 15023 | 19906 | 26513 | 32219 | 32965 | 35424               | 37641      |                  |
|                                       |                                       |                                       | 138   | 213   | 780   | 2896  | 7037  | 14258 | 19053 | 26247 | 31320 | 31757 | 34723               | 37812      |                  |

\* Measurement direction: from right (lowest concentration) to the left (highest concentration)

**b**

| c [ $\mu$ M]                          | 1     | 0.666667 | 0.444444 | 0.296296 | 0.197531 | 0.131687 | 0.087791 | 0.058528 | 0.039018 | 0.026012 | 0.017342 | 0.011561 |            |
|---------------------------------------|-------|----------|----------|----------|----------|----------|----------|----------|----------|----------|----------|----------|------------|
| Fluorescence signal [arbitrary units] | 13111 | 19209    | 25685    | 26338    | 28127    | 30223    | 30879    | 32030    | 32236    | 32405    | 33942    | 37202    | kirromycin |
|                                       | 12709 | 18909    | 24899    | 26486    | 25716    | 29784    | 31266    | 32572    | 33097    | 32663    | 34258    | 37331    |            |
|                                       | 13320 | 19915    | 25763    | 27966    | 29332    | 32372    | 32929    | 34333    | 34825    | 34812    | 35590    | 37847    |            |

\* Measurement direction: from right (lowest concentration) to the left (highest concentration)

### III References

- [1] Bennett, P. M., Grinsted, J., and Richmond, M. H. (1977) Transposition of TnA does not generate deletions, *Mol. Gen. Genet.* 154, 205-211.
- [2] MacNeil, D. J., Gewain, K. M., Ruby, C. L., Dezeny, G., Gibbons, P. H., and MacNeil, T. (1992) Analysis of *Streptomyces avermitilis* genes required for avermectin biosynthesis utilizing a novel integration vector, *Gene* 111, 61-68.
- [3] Flett, F., Mersinias, V., and Smith, C. P. (1997) High efficiency intergeneric conjugal transfer of plasmid DNA from *Escherichia coli* to methyl DNA-restricting streptomycetes, *FEMS Microbiol. Lett.* 155, 223-229.
- [4] Wolf, H., and Zähler, H. (1972) Metabolic products of microorganisms. 99: Kirromycin, *Arch. Microbiol.* 83, 147-154.
- [5] Menges, R., Muth, G., Wohlleben, W., and Stegmann, E. (2007) The ABC transporter Tba of *Amycolatopsis balhimycina* is required for efficient export of the glycopeptide antibiotic balhimycin, *Appl. Microbiol. Biotechnol.* 77, 125-134.
- [6] Koryakina, I., McArthur, J., Randall, S., Draelos, M. M., Musiol, E. M., Muddiman, D. C., Weber, T., and Williams, G. J. (2013) Poly Specific trans-Acyltransferase Machinery Revealed via Engineered Acyl-CoA Synthetases, *ACS Chem. Biol.* 8, 200-208.
- [7] Koryakina, I., and Williams, G. J. (2011) Mutant Malonyl-CoA Synthetases with Altered Specificity for Polyketide Synthase Extender Unit Generation, *Chembiochem* 12, 2289-2293.
